# Supplementary material for: Use of the revised World Health Organization cluster survey methodology to classify measles-rubella vaccination campaign coverage in 47 counties in Kenya, 2016
Source: PubMed Central journal article supplement (PMC6028100; doi:10.1371/journal.pone.0199786), 2018-07-02
Supplement: pone.0199786.s003.pdf [file pone.0199786.s003.pdf]

Household serial number \_\_\_\_\_ - \_\_\_\_\_

## Household Consent and Eligibility

### Kenya Measles-Rubella Post-Campaign Coverage Survey Questionnaire

**Nambari ya Kikundi** \_\_\_\_\_  
Cluster Number

**Jina la Kikundi** \_\_\_\_\_  
Cluster name

**Kaunti** \_\_\_\_\_  
County

**Nambari ya kaunti** \_\_\_\_\_  
County Number

**Wilaya** \_\_\_\_\_  
District

**Tarafa** \_\_\_\_\_  
Division

**Kata** \_\_\_\_\_  
Location

**Kata ndogo** \_\_\_\_\_  
Sub-location

**Mashambani=1/ Mjini=2** \_\_\_\_\_  
Rural=1/ Urban= 2

**Nambari ya Msimamizi** \_\_\_\_\_  
Supervisor Number

**Jina la Msimamizi** \_\_\_\_\_  
Supervisor Name

**Nambari ya anayehoji** \_\_\_\_\_  
Interviewer Number

**Jina la anayehoji** \_\_\_\_\_  
Interviewer Name

**Nambari ya nyumba** \_\_\_\_\_ - \_\_\_\_\_  
Household Serial Number (Cluster number) (HH number) *[Record at top of every page]*

*[If someone is home, please read consent. If no one is home, dwelling not found, or dwelling is vacant, skip consent and fill out interview visit table.]*

**“Habari, jina langu ni \_\_\_\_\_, ninafanya na wizara ya Afya tukishirikiana na Shirika La Takwimu la Kenya. Tunafanya utafiti nchini kote kuhusu kampeni ya chanjo ya Ukambi na Rubella. Tungependa kukuuliza maswali kuhusu familia yako na hali ya chanjo ya Ukambi kwa watoto katika familia yako. Ujumbe huu utasaidia Wizara ya Afya kuboresha huduma za chanjo kote nchini. Maswali yote yatachukua kati ya dakika 20-25 kukamilika. Kujibu maswali haya ni kwa ihiari yako na unaweza kukataa kushiriki. Ujumbe wowote utakaotupa utakuwa wa siri na hautatolewa kwa mtu yeyote mwingine.”**

“Hello, My name is \_\_\_\_\_ and am working with the Ministry of Health in collaboration with the Kenya National Bureau of Statistics. We are conducting a survey across the country about measles and rubella vaccination. We would like to ask some questions about your household and the measles vaccination status of children in your household. This information will help the Ministry of Health to improve the immunization services in the country. The questionnaire usually takes about 20-25 minutes to complete. Participation is voluntary and you can stop at any time. You can refuse to participate without any negative result. Whatever information you provide will be kept strictly confidential.”

Household serial number \_\_\_\_\_-\_\_\_\_\_

**“Naweza kukuuliza maswali sasa?**

“May I begin the Interview now?”

- Yes, permission is given. ⇒ **Continue to next question.**
- If permission is not given, stop the interview. ⇒ Record refusal on the interviewer visit table and re-use this same questionnaire for the next eligible household.

**“ Kuna watoto waliolala ndani ya nyumba hii usiku wa kuamkia leo ambao wana umri kati ya miezi tisa na miaka kumi na nne?”**

“Are there any children between 9 months and 14 years of age who slept here last night?”

- Yes, have eligible child. ⇒ **Continue to interviewer visit table and then proceed to Coverage Survey Questionnaire**
- If no, the interview is over. ⇒ Record household is not eligible on interviewer visit table below.

**Interviewer Visit Table**

*[Record date and time of first visit, and final status code if assigned. If the mother/caretaker of an eligible child is not home, attempt a second visit and third visit if necessary and record the time.]*

|                                     | <b>1</b>                                   | <b>2</b>                                   | <b>Mahojiano ya mwisho</b>                 |
|-------------------------------------|--------------------------------------------|--------------------------------------------|--------------------------------------------|
| Tarehe<br>(Tarehe/mwezi/mwaka)      | ____/____/____<br><input type="checkbox"/> | ____/____/____<br><input type="checkbox"/> | ____/____/____<br><input type="checkbox"/> |
| Nambari *:                          |                                            |                                            |                                            |
| Siku ya mahojiano ijayo<br>Tarehe : | ____/____/____<br>_____                    | ____/____/____<br>_____                    |                                            |
| Saa :                               |                                            |                                            |                                            |

\*Status code: **1. Nimekamilisha mahojiano/Consented to interview and eligible** **2. Hakuna mtoto wa miezi 9 hadi miaka 14 hapa/ No eligible age children** **3. Nimehairisha mahojiano (rudi)/ Postponed (return)** **4. Hakuna mtu mzima kwa nyumba (rudi) / No adult at home (return)** **5. Watu wote hawako nyumbani kwa muda mrefu / Entire household absent for extended period of time** **6. Kukataa /Refused** **7. Boma halipatikani / Dwelling not found** **8. Wanaoishi hawako / Dwelling vacant/ Does not exist** **9. Nyingine- (Taja) / Other- (Specify)**

Household serial number \_\_\_\_\_

## Kenya Measles-Rubella Post-Campaign Coverage Survey Household Questionnaire

**“Kwanza ningependa kukuulizia kuhusu wanaoishi ndani ya nyumba hii.”**

“First, I’d like to ask about the members of this household.”

**Jina la mkuu wa nyumba** \_\_\_\_\_

Name of household head

**Je, ni watu wangapi wanaishi ndani ya nyumba hii?**

How many persons live in the household?

**Idadi/ Number** \_\_\_\_\_

**Ni watoto wangapi walilala hapa usiku wa kuamkia leo? Tafadhali orodhesha watoto hao, pamoja na siku ya kuzaliwa, umri kwenye mpangilio ufuatao. (Watoto wanaostahili ni wale walio na umri kati ya miezi 9 na miaka 14, au wale waliozaliwa kati ya 17 May 2001 na 24 Agosti 2015)**

How many children slept here last night? Please list them, their birthdates, and ages in the table below.

(All eligible children will be those aged **9months-14 years**, or those born between **17 May 2001- 24 Aug. 2015**)

**[Child eligibility table]**

| Nambari<br>Number | Jina la<br>Kwanza la<br>mtoto<br>Child’s First<br>Name | Tarehe ya kuzaliwa<br>[ _ / _ / _ _ _ ]<br>TT/Mwezi/Mwaka<br><i>[Ikiwa tarehe ya kuzaliwa<br/>haipatikani, jaza 99]</i><br><br>Date of birth<br>[DD/MM/YYYY]<br><i>[If unavailable, record 99]</i> | Miaka ya mtoto tarehe 24 Mei 2016<br><i>[Ikiwa hajafikisha mwaka mmoja, jaza<br/>kwa miezi, ikiwa zaidi ya mwaka moja,<br/>jaza miaka]</i><br><br>Age of child on <b>24 May 2016?</b><br><i>[If less than 1 year, write in months. If<br/>more than 1 year, write in years]</i> |                | Anafaa<br>(Ndio,La)<br><br>Eligible<br>(Y, N) |
|-------------------|--------------------------------------------------------|----------------------------------------------------------------------------------------------------------------------------------------------------------------------------------------------------|---------------------------------------------------------------------------------------------------------------------------------------------------------------------------------------------------------------------------------------------------------------------------------|----------------|-----------------------------------------------|
|                   |                                                        |                                                                                                                                                                                                    | Miaka (Years)                                                                                                                                                                                                                                                                   | Miezi (Months) |                                               |
| 1                 |                                                        |                                                                                                                                                                                                    |                                                                                                                                                                                                                                                                                 |                |                                               |
| 2                 |                                                        |                                                                                                                                                                                                    |                                                                                                                                                                                                                                                                                 |                |                                               |
| 3                 |                                                        |                                                                                                                                                                                                    |                                                                                                                                                                                                                                                                                 |                |                                               |
| 4                 |                                                        |                                                                                                                                                                                                    |                                                                                                                                                                                                                                                                                 |                |                                               |
| 5                 |                                                        |                                                                                                                                                                                                    |                                                                                                                                                                                                                                                                                 |                |                                               |
| 6                 |                                                        |                                                                                                                                                                                                    |                                                                                                                                                                                                                                                                                 |                |                                               |
| 7                 |                                                        |                                                                                                                                                                                                    |                                                                                                                                                                                                                                                                                 |                |                                               |
| 8                 |                                                        |                                                                                                                                                                                                    |                                                                                                                                                                                                                                                                                 |                |                                               |
| 9                 |                                                        |                                                                                                                                                                                                    |                                                                                                                                                                                                                                                                                 |                |                                               |
| 10                |                                                        |                                                                                                                                                                                                    |                                                                                                                                                                                                                                                                                 |                |                                               |
| 11                |                                                        |                                                                                                                                                                                                    |                                                                                                                                                                                                                                                                                 |                |                                               |
| 12                |                                                        |                                                                                                                                                                                                    |                                                                                                                                                                                                                                                                                 |                |                                               |
| 13                |                                                        |                                                                                                                                                                                                    |                                                                                                                                                                                                                                                                                 |                |                                               |
| 14                |                                                        |                                                                                                                                                                                                    |                                                                                                                                                                                                                                                                                 |                |                                               |
| 15                |                                                        |                                                                                                                                                                                                    |                                                                                                                                                                                                                                                                                 |                |                                               |

**Kuna akina mama (walezi) wangapi wenye watoto wa umri wa miezi 9 hadi miaka 14 waliolala hapa usiku wa kuamkia leo? [Uliza: Je, kuna akina mama wengine wanaoishi ndani ya nyumba na watoto wenye umri huu? Kwa mfano, bibi wengine, shangazi, na wasaidizi wa nyumbani?]**

Household serial number \_\_\_\_\_

How many mothers (or primary caregivers) are there for the children listed above who are aged 9 months to 14 years who slept here last night? [Prompt: are there any other women staying in the household with children this age, like other wives, aunts and house help?]

**Idadi ya akina mama/walezi** \_\_\_\_\_

Number of mothers/caregivers

**[Mother/caregiver table]**

*[Please list all mothers or primary caregivers of children aged 9 months-14 years of age who slept in the household last night, including those not present at the time of the survey. Use the child table from the previous page to determine the number of eligible children each mother has]*

| Nambari<br>Number | Jina la mama au Mlezi wa mtoto<br>Name of mother/caregiver | Nambari ya watoto kati ya<br>miezi 9 na miaka 14<br>Number of children aged 9<br>months-14 years | Umri ya mama<br>Age of mother |
|-------------------|------------------------------------------------------------|--------------------------------------------------------------------------------------------------|-------------------------------|
| 1                 |                                                            |                                                                                                  |                               |
| 2                 |                                                            |                                                                                                  |                               |
| 3                 |                                                            |                                                                                                  |                               |
| 4                 |                                                            |                                                                                                  |                               |
| 5                 |                                                            |                                                                                                  |                               |
| 6                 |                                                            |                                                                                                  |                               |

**[Selecting a respondent]**

*[If there is more than one mother/caregiver with eligible children, select one using the random number table. To use it, circle the total number of eligible mothers/caregivers in the column on the top. Then, circle the final numeral of the household number in the row on the left. Circle the box where this column and row intersect. That number will be your randomly chosen number to identify the mother listed in Table 1.]*

| Random Number Table               |   | Number of Eligible Mothers/Caregivers |   |   |   |   |
|-----------------------------------|---|---------------------------------------|---|---|---|---|
|                                   |   | 2                                     | 3 | 4 | 5 | 6 |
| Last digit of Household<br>Number | 0 | 2                                     | 3 | 4 | 1 | 5 |
|                                   | 1 | 2                                     | 1 | 2 | 1 | 2 |
|                                   | 2 | 2                                     | 1 | 4 | 2 | 3 |
|                                   | 3 | 1                                     | 3 | 3 | 3 | 4 |
|                                   | 4 | 2                                     | 1 | 2 | 5 | 4 |
|                                   | 5 | 2                                     | 1 | 2 | 3 | 5 |
|                                   | 6 | 1                                     | 2 | 4 | 4 | 1 |
|                                   | 7 | 2                                     | 3 | 3 | 5 | 2 |
|                                   | 8 | 1                                     | 2 | 2 | 3 | 6 |
|                                   | 9 | 1                                     | 3 | 4 | 4 | 1 |



| <b>Sehemu ya B: Kujua kuhusu kampeni ya chanjo ya ukambi na rubella/ Section B: Measles-rubella vaccination campaign awareness</b>                                               |                                                                                                                                                                                                                                                                                                                                                                                                                                                                                                                                                                                                                                                                                                                                                                                                                                                                                                                                                                                                                                                                                                                                                                                                                                                                                                                                                                                                                                                                                                                                                                                                                                                                                                                                                                                                                                                                                                          |
|----------------------------------------------------------------------------------------------------------------------------------------------------------------------------------|----------------------------------------------------------------------------------------------------------------------------------------------------------------------------------------------------------------------------------------------------------------------------------------------------------------------------------------------------------------------------------------------------------------------------------------------------------------------------------------------------------------------------------------------------------------------------------------------------------------------------------------------------------------------------------------------------------------------------------------------------------------------------------------------------------------------------------------------------------------------------------------------------------------------------------------------------------------------------------------------------------------------------------------------------------------------------------------------------------------------------------------------------------------------------------------------------------------------------------------------------------------------------------------------------------------------------------------------------------------------------------------------------------------------------------------------------------------------------------------------------------------------------------------------------------------------------------------------------------------------------------------------------------------------------------------------------------------------------------------------------------------------------------------------------------------------------------------------------------------------------------------------------------|
| <b>B1</b>                                                                                                                                                                        | <p><b>Je, unajua kuhusu kampeni ya chanjo ya ukambi na rubella iliyofanyika mwezi uliopita?</b><br/>Were you aware of the measles-rubella vaccination campaign occurring last month?</p> <p><input type="checkbox"/> 1. Ndio <span style="float: right;">1. Yes</span><br/><input type="checkbox"/> 2. La [enda C1] <span style="float: right;">2. No [Skip to C1]</span></p>                                                                                                                                                                                                                                                                                                                                                                                                                                                                                                                                                                                                                                                                                                                                                                                                                                                                                                                                                                                                                                                                                                                                                                                                                                                                                                                                                                                                                                                                                                                            |
| <b>B2</b>                                                                                                                                                                        | <p><b>Je ulipata ujumbe kuhusu kampeni hiyo kutoka wapi? (Chagua ya kwanza kama njia muhimu ya kupata habari)</b><br/>What is your main source of information regarding the campaign? [Choose the first source that the mother reports as MAIN source]</p> <p><input type="checkbox"/> 1. Mhudumu wa afya <span style="float: right;">1. Health worker</span><br/><input type="checkbox"/> 2. Mgeni <span style="float: right;">2. House visitor</span><br/><input type="checkbox"/> 3. Kipaza sauti/ tangazo kwa umma <span style="float: right;">3. Loudspeaker/ Public announcement</span><br/><input type="checkbox"/> 4. Mabano <span style="float: right;">4. Poster/banner</span><br/><input type="checkbox"/> 5. Gazeti <span style="float: right;">5. Newspaper</span><br/><input type="checkbox"/> 6. Redio <span style="float: right;">6. Radio</span><br/><input type="checkbox"/> 7. Televisheni <span style="float: right;">7. Television</span><br/><input type="checkbox"/> 8. Simu ya mkono/ujumbe mfupi <span style="float: right;">8. Mobile phone/SMS</span><br/><input type="checkbox"/> 9. Familia/Jirani/Rafiki <span style="float: right;">9. Family/neighbor/friends</span><br/><input type="checkbox"/> 10. Kikundi (Cha akina mama /vijana) <span style="float: right;">10. Women's/Youth group</span><br/><input type="checkbox"/> 11. Kanisani/ Msikitini <span style="float: right;">11. Church/mosque/temple</span><br/><input type="checkbox"/> 12. Kiongozi wa jamii <span style="float: right;">12. Community leader</span><br/><input type="checkbox"/> 13. Waliopeana chanjo <span style="float: right;">13. Campaign vaccinator</span><br/><input type="checkbox"/> 14. Mtandao <span style="float: right;">14. Internet/social media</span><br/><input type="checkbox"/> 15. Ingine (Eleza) _____ <span style="float: right;">15. Other (Specify) _____</span></p> |
| <b>B3</b>                                                                                                                                                                        | <p><b>Tafadhali, orodhesha njia zingine za kupata habari kuhusu kampeni</b><br/>Please list all other sources of information regarding the campaign</p> <p><input type="checkbox"/> 1. Mhudumu wa afya <span style="float: right;">1. Health worker</span><br/><input type="checkbox"/> 2. Mgeni <span style="float: right;">2. House visitor</span><br/><input type="checkbox"/> 3. Kipaza sauti/ tangazo kwa umma <span style="float: right;">3. Loudspeaker/ Public announcement</span><br/><input type="checkbox"/> 4. Mabano <span style="float: right;">4. Poster/banner</span><br/><input type="checkbox"/> 5. Gazeti <span style="float: right;">5. Newspaper</span><br/><input type="checkbox"/> 6. Redio <span style="float: right;">6. Radio</span><br/><input type="checkbox"/> 7. Televisheni <span style="float: right;">7. Television</span><br/><input type="checkbox"/> 8. Simu ya mkono/ujumbe mfupi <span style="float: right;">8. Mobile phone/SMS</span><br/><input type="checkbox"/> 9. Familia/Jirani/Rafiki <span style="float: right;">9. Family/neighbor/friends</span><br/><input type="checkbox"/> 10. Kikundi (Cha akina mama/vijana) <span style="float: right;">10. Women's/Youth group</span><br/><input type="checkbox"/> 11. Kanisani/ Msikitini/ <span style="float: right;">11. Church/mosque/temple</span><br/><input type="checkbox"/> 12. Kiongozi wa jamii <span style="float: right;">12. Community leader</span><br/><input type="checkbox"/> 13. Waliopeana chanjo <span style="float: right;">13. Campaign vaccinator</span><br/><input type="checkbox"/> 14. Mtandao <span style="float: right;">14. Internet/social media</span><br/><input type="checkbox"/> 15. Ingine (Eleza) _____ <span style="float: right;">15. Other (Specify) _____</span></p>                                                                                                    |
| <p><b>"Sasa nitakuuliza kuhusu watoto wako na kama wamewahi kupata chanjo aina yoyote "</b><br/>"Next, I'm going to ask about the children and their vaccination histories."</p> |                                                                                                                                                                                                                                                                                                                                                                                                                                                                                                                                                                                                                                                                                                                                                                                                                                                                                                                                                                                                                                                                                                                                                                                                                                                                                                                                                                                                                                                                                                                                                                                                                                                                                                                                                                                                                                                                                                          |

Household serial number \_\_\_\_\_-\_\_\_\_\_

**Sehemu ya C: Kampeni ya Chanjo dhidi ya ukambi na rubella ya watoto wenye umri wa miezi 9 hadi miaka 14/ Section C: MR Campaign Vaccination for Children Aged 9 months – 14 years**

| Nambari ya mtoto<br>Number of child | C1                                                                                           | C2                                                                                                                                                                                                                                                                          | C3                                                                                                                                                                                                                                                     |  | C4                                                                              | C5                                                                                                                                                                                           | C6                                                                                                                                                                                      | C7                                                                                                                                    |
|-------------------------------------|----------------------------------------------------------------------------------------------|-----------------------------------------------------------------------------------------------------------------------------------------------------------------------------------------------------------------------------------------------------------------------------|--------------------------------------------------------------------------------------------------------------------------------------------------------------------------------------------------------------------------------------------------------|--|---------------------------------------------------------------------------------|----------------------------------------------------------------------------------------------------------------------------------------------------------------------------------------------|-----------------------------------------------------------------------------------------------------------------------------------------------------------------------------------------|---------------------------------------------------------------------------------------------------------------------------------------|
|                                     | Jina la mtoto<br>(Miezi 9 hadi miaka 14)<br><br>Name of child<br>[Aged 9 months to 14 years] | Tarehe ya kuzaliwa<br>[ _/ _/ _ _ _ ]<br>TT/Mwezi/Mwaka<br>[enda C4]<br><br>[Ikiwa tarehe ya kuzaliwa haipatikani, jaza 99 kwenye nafasi hii, enda swali C3]<br><br>Date of birth<br>[DD/MM/YYYY]<br>[Skip to C4]<br>[If unavailable, record 99 and proceed to question C3] | Miaka ya mtoto tarehe 24 Mei 2016<br><br>Ikiwa hajafikisha mwaka mmoja, jaza kwa miezi, ikiwa ana zaidi ya mwaka mmoja, jaza miaka]<br><br>Age of child on 24 May 2016?<br>[If less than 1 year, write in months. If more than 1 year, write in years] |  | Jinsia ya mtoto<br>Kiume=1<br>Kike=2<br><br>Sex of Child<br>Male=1<br>Female =2 | Orodha ya kuzaliwa<br>1, 2,3...n.k<br><b>(Ikiwa orodha haijulikani au mtoto ni wakuigwa jaza 99)</b><br><br>Birth order 1,2,3... etc<br>[If birth order unknown, or child adopted, write 99] | Je, mtoto anaenda shule?<br>Shule ya mchana=1<br>Shule ya Bweni=2<br>La =3<br>Sijui=4<br><br>Is the child going to school?<br>Day school=1<br>Boarding school=2<br>No=3<br>Don't know=4 | Je, mtoto yuko hapo wakati wa mahojiano?<br>Ndio=1<br>La=2<br><br>Is the child present at the time of the interview?<br>Yes=1<br>No=2 |
| 1                                   |                                                                                              |                                                                                                                                                                                                                                                                             |                                                                                                                                                                                                                                                        |  |                                                                                 |                                                                                                                                                                                              |                                                                                                                                                                                         |                                                                                                                                       |
| 2                                   |                                                                                              |                                                                                                                                                                                                                                                                             |                                                                                                                                                                                                                                                        |  |                                                                                 |                                                                                                                                                                                              |                                                                                                                                                                                         |                                                                                                                                       |
| 3                                   |                                                                                              |                                                                                                                                                                                                                                                                             |                                                                                                                                                                                                                                                        |  |                                                                                 |                                                                                                                                                                                              |                                                                                                                                                                                         |                                                                                                                                       |
| 4                                   |                                                                                              |                                                                                                                                                                                                                                                                             |                                                                                                                                                                                                                                                        |  |                                                                                 |                                                                                                                                                                                              |                                                                                                                                                                                         |                                                                                                                                       |
| 5                                   |                                                                                              |                                                                                                                                                                                                                                                                             |                                                                                                                                                                                                                                                        |  |                                                                                 |                                                                                                                                                                                              |                                                                                                                                                                                         |                                                                                                                                       |
| 6                                   |                                                                                              |                                                                                                                                                                                                                                                                             |                                                                                                                                                                                                                                                        |  |                                                                                 |                                                                                                                                                                                              |                                                                                                                                                                                         |                                                                                                                                       |
| 7                                   |                                                                                              |                                                                                                                                                                                                                                                                             |                                                                                                                                                                                                                                                        |  |                                                                                 |                                                                                                                                                                                              |                                                                                                                                                                                         |                                                                                                                                       |
| 8                                   |                                                                                              |                                                                                                                                                                                                                                                                             |                                                                                                                                                                                                                                                        |  |                                                                                 |                                                                                                                                                                                              |                                                                                                                                                                                         |                                                                                                                                       |

CHILD Questionnaire No. \_\_\_\_ OF \_\_\_\_ (Complete additional forms for more than 8 children. Please indicate how many CHILD Questionnaires are completed. Keep CHILD ID of the surveyed children fixed on each page. If ID of a child James is 03 on page 1, it will remain 03 on all pages)

Household serial number \_\_\_\_\_-\_\_\_\_\_

**Sehemu ya C: Kampeni ya Chanjo dhidi ya ukambi na rubella ya watoto wenye umri wa miezi 9 hadi miaka 14/ Section C: MR Campaign Vaccination for Children Aged 9 months – 14 years**

|                                                | <b>C8</b>                                                                                                                                                                                                                                                                                                                                                                        | <b>C9</b>                                                                                                                                                                                                              | <b>C10</b>                                                                                                                                                                                                                                                                                                                  |
|------------------------------------------------|----------------------------------------------------------------------------------------------------------------------------------------------------------------------------------------------------------------------------------------------------------------------------------------------------------------------------------------------------------------------------------|------------------------------------------------------------------------------------------------------------------------------------------------------------------------------------------------------------------------|-----------------------------------------------------------------------------------------------------------------------------------------------------------------------------------------------------------------------------------------------------------------------------------------------------------------------------|
| <b>Nambari ya mtoto</b><br><br>Number of child | <b>Je, mtoto alipata chanjo ya ukambi-rubella wakati wa kampeni</b><br><i>[Jibu moja – dhibitisha kwa kutizama wino kwenye kidole au ujumbe kutoka kwa mhadumu] (ona vielezo) [ikiwa ni la, enda C10]</i><br><br>Did the child receive the measles-rubella vaccine during the campaign?<br><i>[ONE response- Fingerprint preferred to recall] (see code) [If N, skip to C10]</i> | <b>Mtoto alipata chanjo ya ukambi-rubella katika eneo gani/wapi?</b><br><i>(ona vielezo) [enda C11]</i><br><br>At what location did your child receive the measles-rubella vaccine?<br><i>(see code) [Skip to C11]</i> | <b>Je, ni sababu gani kuu ilizuia mtoto kupata chanjo wakati wa kampeni?</b><br><i>[Jibu moja- sababu ya kwanza itakayotajwa na] (ona vielezo)</i><br><br>What was the main reason for the child not receiving the campaign vaccine?<br><i>[ONE response- note the FIRST REASON mentioned by the respondent] (see code)</i> |
| <b>1</b>                                       |                                                                                                                                                                                                                                                                                                                                                                                  |                                                                                                                                                                                                                        |                                                                                                                                                                                                                                                                                                                             |
| <b>2</b>                                       |                                                                                                                                                                                                                                                                                                                                                                                  |                                                                                                                                                                                                                        |                                                                                                                                                                                                                                                                                                                             |
| <b>3</b>                                       |                                                                                                                                                                                                                                                                                                                                                                                  |                                                                                                                                                                                                                        |                                                                                                                                                                                                                                                                                                                             |
| <b>4</b>                                       |                                                                                                                                                                                                                                                                                                                                                                                  |                                                                                                                                                                                                                        |                                                                                                                                                                                                                                                                                                                             |
| <b>5</b>                                       |                                                                                                                                                                                                                                                                                                                                                                                  |                                                                                                                                                                                                                        |                                                                                                                                                                                                                                                                                                                             |
| <b>6</b>                                       |                                                                                                                                                                                                                                                                                                                                                                                  |                                                                                                                                                                                                                        |                                                                                                                                                                                                                                                                                                                             |
| <b>7</b>                                       |                                                                                                                                                                                                                                                                                                                                                                                  |                                                                                                                                                                                                                        |                                                                                                                                                                                                                                                                                                                             |
| <b>8</b>                                       |                                                                                                                                                                                                                                                                                                                                                                                  |                                                                                                                                                                                                                        |                                                                                                                                                                                                                                                                                                                             |

CHILD Questionnaire No. \_\_\_\_ OF \_\_\_\_ (Complete additional forms for more than 8 children. Please indicate how many CHILD Questionnaires are completed. Keep CHILD ID of the surveyed children fixed on each page. If ID of a child James is 03 on page 1, it will remain 03 on all pages.)



Household serial number \_\_\_\_\_

**Sehemu ya C: Kampeni ya Chanjo dhidi ya ukambi na rubella ya watoto wenye umri wa miezi 9 hadi miaka 14/ Section C: MR Campaign Vaccination for Children Aged 9 months – 14 years**

CODE (Do not write on here, fill in answer box on previous sheet using codes below)

| C8                                                                  |   | C9                                                                  |   | C10                                                                                                                                               |    |
|---------------------------------------------------------------------|---|---------------------------------------------------------------------|---|---------------------------------------------------------------------------------------------------------------------------------------------------|----|
| <b>Ndio, kuna wino kwenye kidole</b><br>Yes, fingermark present     | 1 | <b>Shule / School</b>                                               | 1 | <b>Kutojua kuhusu kampeni / Unaware of campaign</b>                                                                                               | 01 |
|                                                                     |   |                                                                     |   | <b>Kutojua umuhimu wa chanjo / Unaware of need for vaccination</b>                                                                                | 02 |
| <b>Ndio, ujumbe kutoka kwa Mlezi</b><br>Yes, by recall of caretaker | 2 | <b>Hospitali ya Serikal</b><br>Govt. Health facility                | 2 | <b>Mtoto hakuwepo wakati wa kampeni ya chanjo / Child absent during vaccination campaign</b>                                                      | 03 |
|                                                                     |   |                                                                     |   | <b>Mtoto tayari amechanjwa / Child already vaccinated</b>                                                                                         | 04 |
| <b>La / No</b>                                                      | 3 | <b>Hospitali ya kibinafsi</b><br>Private Health facility            | 3 | <b>Mtoto alikuwa mgonjwa / Child sick</b>                                                                                                         | 05 |
|                                                                     |   |                                                                     |   | <b>Sikuwa na wakati wa kwenda kwenye kampeni / Too busy to go to campaign</b>                                                                     | 06 |
| <b>Sijui / Don't know</b>                                           | 4 | <b>Sokoni / Market</b>                                              | 4 | <b>Nilisahau kumpeleka mtoto kwenye kampeni ya chanjo / Forgot to take child for vaccination campaign</b>                                         | 07 |
|                                                                     |   |                                                                     |   | <b>Pahali pa kutolewa chanjo ni mbali / Post too far</b>                                                                                          | 08 |
|                                                                     |   | <b>Kwenye kijiji</b><br>Village meeting point                       | 5 | <b>Nilienda lakini laini ilikuwa ndefu sikusubiri / Went, but line too long so didn't wait</b>                                                    | 09 |
|                                                                     |   |                                                                     |   | <b>Nilienda lakini chanjo haikuwa hospitalini / Went, but vaccine not available at facility</b>                                                   | 10 |
|                                                                     |   | <b>Kanisani/Msikitini</b><br>Church/Mosque                          | 6 | <b>Nilienda lakini kituo cha kupeana chanjo kilikuwa kimefungwa/ Went, but vaccination post/clinic closed</b>                                     | 11 |
|                                                                     |   |                                                                     |   | <b>Mhudumu wa afya aliniongelesha vibaya / Health staff rude</b>                                                                                  | 12 |
|                                                                     |   | <b>Pahali pa kupokea Chanjo</b><br>Temporary fixed vaccination post | 7 | <b>Mama alikataa / Mother refused</b>                                                                                                             | 13 |
|                                                                     |   |                                                                     |   | <b>Mume/mkuu wa nyumba alikataa / Husband/head of household refused</b>                                                                           | 14 |
|                                                                     |   | <b>Nyumbani / House</b>                                             | 8 | <b>Naamini kuwa chanjo inaweza kudhuru / Believe that vaccine can cause harm</b>                                                                  | 15 |
|                                                                     |   |                                                                     |   | <b>Siamini chanjo / Do not trust vaccines</b>                                                                                                     | 16 |
|                                                                     |   |                                                                     |   | <b>Sababu za kidini/kitamaduni / Religious/cultural reasons</b>                                                                                   | 17 |
|                                                                     |   |                                                                     |   | <b>Chanjo ya kampeni sio nzuri kama ile ya klinik/hospitali / Campaign vaccine not as good as vaccine offered through routine health services</b> | 18 |
|                                                                     |   | <b>Pahali pengine, (Elezea)</b><br>Other (Specify)                  | 9 | <b>Sijui / Don't know</b>                                                                                                                         | 19 |
|                                                                     |   |                                                                     |   | <b>Sababu zinigine (Elezea) / Other (Specify)</b>                                                                                                 | 20 |

Household serial number \_\_\_\_\_

**Sehemu ya C: Kampeni ya Chanjo dhidi ya ukambi na rubella ya watoto wenye umri wa miezi 9 hadi miaka 14/ Section C: MR Campaign Vaccination for Children Aged 9 months – 14 years**

|                                                | <b>C11</b>                                                                                                                                                                                                                                                                                                                                                                                                                                                                                                            | <b>C12</b>                                                                                                                                                                           | <b>C13</b>                                                                                                                                                                                            | <b>C14</b>                                                                                                                                                                                 | <b>C15</b>                                                                                                                                                                                                                                                                                                        | <b>C16</b>                                                                                                                       | <b>C17</b>                                                                           |
|------------------------------------------------|-----------------------------------------------------------------------------------------------------------------------------------------------------------------------------------------------------------------------------------------------------------------------------------------------------------------------------------------------------------------------------------------------------------------------------------------------------------------------------------------------------------------------|--------------------------------------------------------------------------------------------------------------------------------------------------------------------------------------|-------------------------------------------------------------------------------------------------------------------------------------------------------------------------------------------------------|--------------------------------------------------------------------------------------------------------------------------------------------------------------------------------------------|-------------------------------------------------------------------------------------------------------------------------------------------------------------------------------------------------------------------------------------------------------------------------------------------------------------------|----------------------------------------------------------------------------------------------------------------------------------|--------------------------------------------------------------------------------------|
| <b>Nambari ya mtoto</b><br><br>Number of child | <b>Sasa nitakuuliza maswali kuhusu chanjo ya kawaida kwa mtoto wako</b><br><b>Je, mtoto ashawahipata hata chanjo moja ya ukambi wakati wa kliniki</b><br><i>Jibu moja, kadi ni rahisi kukumbuka</i><br><i>[kama la enda C15]</i><br><br>Now I am going to ask you questions about your child's routine immunizations. Did the child receive at least one dose of measles vaccine through routine health services?<br><i>[ONE response- Order of preference: Card preferred to recall]</i><br><i>[IF N, go to C15]</i> | <b>Kama tarehe imeandikwa kwenye kadi ya kliniki, andika tarehe ya chanjo ya kwanza ya ukambi.</b><br>[ _ / _ / _ _ _ ]<br>(TT/Mwezi/Mwaka)<br>[Ikiwa tarehe haiko andika 99]        | <b>Je, mtoto alipata chanjo ya pili ya ukambi?</b><br>Ndio=1<br>La=2<br>Sijui=3<br>[Ikiwa ni La, enda C16]                                                                                            | <b>Ikiwa tarehe imeandikwa kwenye kadi ya kliniki, andika siku ya chanjo ya pili ya ukambi.</b><br>[ _ / _ / _ _ _ ]<br>(TT/Mwezi/Mwaka)<br>[Ikiwa tarehe haiko andika 99, kisha enda C16] | <b>Je, kwanini mtoto hakupata chanjo ya ukambi kwa kliniki?</b><br><i>[Jibu moja-andika sababu ya kwanza itakayotajwa.]</i><br><i>(Ona vielezo)</i><br><br>Why did the child not receive a routine measles dose?<br><i>[ONE response- note the FIRST REASON mentioned by the respondent]</i><br><i>(see code)</i> | <b>Je, mtoto alipata chanjo yoyote ya ukambi wakati wa kampeni zingine [2012, 2009, 2006, 2002]</b><br>Ndio=1<br>La=2<br>Sijui=3 | <b>Mtoto alipata chanjo mara ngapi wakati wa kampeni zilizopita?</b><br>[1,2,3 au 4] |
|                                                | Did the child receive a <i>second</i> routine measles dose?<br>Yes=1<br>No=2<br>Don't know=3<br><i>[IF N, go to C16]</i>                                                                                                                                                                                                                                                                                                                                                                                              | If date legible on vaccination card, give the date of <i>first</i> routine measles vaccination.<br>[ _ / _ / _ _ _ ]<br>(DD/MM/YYYY)<br><i>[If date unavailable, record 99 here]</i> | If date legible on vaccination card, give the date of <i>second</i> routine measles vaccination.<br>[ _ / _ / _ _ _ ]<br>(DD/MM/YYYY)<br><i>[If date unavailable, record 99 here and skip to C16]</i> | Did the child receive any measles doses during previous campaigns?<br>[2012, 2009, 2006, 2002]<br>Yes=1<br>No=2<br>Don't know=3                                                            | How many previous campaign doses did the child receive?<br>[1,2,3, or 4]                                                                                                                                                                                                                                          |                                                                                                                                  |                                                                                      |
| <b>1</b>                                       |                                                                                                                                                                                                                                                                                                                                                                                                                                                                                                                       |                                                                                                                                                                                      |                                                                                                                                                                                                       |                                                                                                                                                                                            |                                                                                                                                                                                                                                                                                                                   |                                                                                                                                  |                                                                                      |
| <b>2</b>                                       |                                                                                                                                                                                                                                                                                                                                                                                                                                                                                                                       |                                                                                                                                                                                      |                                                                                                                                                                                                       |                                                                                                                                                                                            |                                                                                                                                                                                                                                                                                                                   |                                                                                                                                  |                                                                                      |
| <b>3</b>                                       |                                                                                                                                                                                                                                                                                                                                                                                                                                                                                                                       |                                                                                                                                                                                      |                                                                                                                                                                                                       |                                                                                                                                                                                            |                                                                                                                                                                                                                                                                                                                   |                                                                                                                                  |                                                                                      |
| <b>4</b>                                       |                                                                                                                                                                                                                                                                                                                                                                                                                                                                                                                       |                                                                                                                                                                                      |                                                                                                                                                                                                       |                                                                                                                                                                                            |                                                                                                                                                                                                                                                                                                                   |                                                                                                                                  |                                                                                      |
| <b>5</b>                                       |                                                                                                                                                                                                                                                                                                                                                                                                                                                                                                                       |                                                                                                                                                                                      |                                                                                                                                                                                                       |                                                                                                                                                                                            |                                                                                                                                                                                                                                                                                                                   |                                                                                                                                  |                                                                                      |
| <b>6</b>                                       |                                                                                                                                                                                                                                                                                                                                                                                                                                                                                                                       |                                                                                                                                                                                      |                                                                                                                                                                                                       |                                                                                                                                                                                            |                                                                                                                                                                                                                                                                                                                   |                                                                                                                                  |                                                                                      |
| <b>7</b>                                       |                                                                                                                                                                                                                                                                                                                                                                                                                                                                                                                       |                                                                                                                                                                                      |                                                                                                                                                                                                       |                                                                                                                                                                                            |                                                                                                                                                                                                                                                                                                                   |                                                                                                                                  |                                                                                      |
| <b>8</b>                                       |                                                                                                                                                                                                                                                                                                                                                                                                                                                                                                                       |                                                                                                                                                                                      |                                                                                                                                                                                                       |                                                                                                                                                                                            |                                                                                                                                                                                                                                                                                                                   |                                                                                                                                  |                                                                                      |

CHILD Questionnaire No. \_\_\_\_ OF \_\_\_\_ (Complete additional forms for more than 8 children. Please indicate how many CHILD Questionnaires are completed.

Keep CHILD ID of the surveyed children fixed on each page. If ID of a child James is 03 on page 1, it will remain 03 on all pages.

Household serial number \_\_\_\_\_-\_\_\_\_\_

**Sehemu ya C: Kampeni ya Chanjo dhidi ya ukambi na rubella ya watoto wenye umri wa miezi 9 hadi miaka 14 / Section C: MR Campaign Vaccination for Children Aged 9 months – 14 years**

CODE (Do not write on here, fill in answer box on previous sheet using codes below)

| <b>C11</b>                                                                           |   | <b>C15</b>                                                                                                        |    |
|--------------------------------------------------------------------------------------|---|-------------------------------------------------------------------------------------------------------------------|----|
| <b>Ndio, kadi ya kliniki iko</b><br>Yes, vaccination card or child booklet available | 1 | <b>Kutojua umuhimu wa chanjo / Unaware of need for vaccination</b>                                                | 01 |
|                                                                                      |   | <b>Sikuwa na wakati wa kumpeleka kwa chanjo kwenye kliniki /Too busy to take child in for routine vaccination</b> | 02 |
|                                                                                      | 2 | <b>Nilisahau kumpeleka mtoto chanjo / Forgot to take child for vaccinations</b>                                   | 03 |
|                                                                                      |   | <b>Mtoto alikuwa mgonjwa / Child sick</b>                                                                         | 04 |
|                                                                                      |   | <b>Pahali pa kutolewa chanjo ni mbali / Vaccination post too far</b>                                              | 05 |
|                                                                                      |   | <b>Nilienda lakini laini ilikuwa ndefu sikusubiri / Went, but line too long so didn't wait</b>                    | 06 |
|                                                                                      | 3 | <b>Nilienda lakini chanjo haikuwa hospitalini / Went, but vaccine not available at facility</b>                   | 07 |
|                                                                                      |   | <b>Nilienda lakini kituo cha kupeana chanjo kilikuwa kimefungwa / Went, but vaccination post/clinic closed</b>    | 08 |
|                                                                                      | 4 | <b>Mhudumu wa afya aliongelesha vibaya / Health staff rude</b>                                                    | 09 |
|                                                                                      |   | <b>Chanjo inaweza kudhuru / Believe that vaccine can cause harm</b>                                               | 10 |
|                                                                                      |   | <b>Siamini chanjo / Do not trust vaccines</b>                                                                     | 11 |
|                                                                                      |   | <b>Sababu za kidini/kitamaduni / Religious/cultural reasons</b>                                                   | 12 |
|                                                                                      |   | <b>Mama alikataa / Mother refused</b>                                                                             | 13 |
|                                                                                      |   | <b>Mume/mkuu wa nyumba alikataa / Husband/head of household refused</b>                                           | 14 |
|                                                                                      |   | <b>Sijui / Don't know</b>                                                                                         | 15 |
|                                                                                      |   | <b>Sababu zingine / Other (Specify)</b>                                                                           | 16 |
| <b>Ndio, ujumbe wa Mlezi</b><br>Yes, by recall of caretaker                          |   |                                                                                                                   |    |
| <b>La / No</b>                                                                       |   |                                                                                                                   |    |
| <b>Sijui / Don't know</b>                                                            |   |                                                                                                                   |    |

| <b>Sehemu ya D: Matumizi ya simu ya mkono na ujumbe mfupi / Section D: Mobile phone use</b>                      |                                                                                                                                                                                                                                                                                                                                                                                                                                                                                                                                                                                                                                                                                                                                       |
|------------------------------------------------------------------------------------------------------------------|---------------------------------------------------------------------------------------------------------------------------------------------------------------------------------------------------------------------------------------------------------------------------------------------------------------------------------------------------------------------------------------------------------------------------------------------------------------------------------------------------------------------------------------------------------------------------------------------------------------------------------------------------------------------------------------------------------------------------------------|
| <b>Sasa nitakuuliza kuhusu utumizi wako wa rununu (simu)</b><br>"Next, I'm going to ask about mobile phone use." |                                                                                                                                                                                                                                                                                                                                                                                                                                                                                                                                                                                                                                                                                                                                       |
| <b>D1</b>                                                                                                        | <b>Je una rununu (simu)?</b><br>Do you own a mobile phone?<br><input type="checkbox"/> 1. Ndio [enda D4] <span style="float: right;">1. Yes [skip to D4]</span><br><input type="checkbox"/> 2. La <span style="float: right;">2. No</span>                                                                                                                                                                                                                                                                                                                                                                                                                                                                                            |
| <b>D2</b>                                                                                                        | <b>Kunayo rununu (simu) kwenye nyumba ambayo unaweza tumia?</b><br>Is there a mobile phone in the household that you use?<br><input type="checkbox"/> 1. Ndio <span style="float: right;">1. Yes</span><br><input type="checkbox"/> 2. La [enda D17] <span style="float: right;">2. No [skip to D17]</span>                                                                                                                                                                                                                                                                                                                                                                                                                           |
| <b>D3</b>                                                                                                        | <b>Rununu (simu) hiyo ni ya nani?</b><br>Whose phone is it?<br><input type="checkbox"/> 1. Familia <span style="float: right;">1. Family</span><br><input type="checkbox"/> 2. Rafiki <span style="float: right;">2. Friend</span><br><input type="checkbox"/> 3. Simu ya jamii <span style="float: right;">3. Community phone</span><br><input type="checkbox"/> 4. Ingingine, eleza: _____ <span style="float: right;">4. Other, specify: _____</span>                                                                                                                                                                                                                                                                              |
| <b>D4</b>                                                                                                        | <b>Ni mtandao upi wa simu unatumia wakati mwingi? [Chagua moja]</b><br>Which mobile phone network do you use most of the time? (Choose only one)<br><input type="checkbox"/> 1. Safaricom <span style="float: right;">1. Safaricom</span><br><input type="checkbox"/> 2. Airtel/Zain <span style="float: right;">2. Airtel/Zain</span><br><input type="checkbox"/> 3. Orange <span style="float: right;">3. Orange</span><br><input type="checkbox"/> 4. Yumobile <span style="float: right;">4. Yumobile</span><br><input type="checkbox"/> 5. Equitel <span style="float: right;">5. Equitel</span><br><input type="checkbox"/> 6. Ingingine, eleza: _____ <span style="float: right;">6. Other, specify: _____</span>              |
| <b>D5</b>                                                                                                        | <b>Ni mara ngapi huwa una shida ya kupiga simu kwa sababu ya shida za mtandao (network)?</b><br>How often do you have problems making phone calls because of poor network?<br><input type="checkbox"/> 1. Hakuna <span style="float: right;">1. Never</span><br><input type="checkbox"/> 2. Nadra <span style="float: right;">2. Rarely</span><br><input type="checkbox"/> 3. Mara mwa mara <span style="float: right;">3. Sometimes</span><br><input type="checkbox"/> 4. Mara nyingi <span style="float: right;">4. Frequently</span><br><input type="checkbox"/> 5. Kila siku <span style="float: right;">5. Daily</span><br><input type="checkbox"/> 6. Sijui <span style="float: right;">6. Don't know</span>                    |
| <b>D6</b>                                                                                                        | <b>Je, unatumia mtandao (network) mwingine wapili wa simu?</b><br>Do you use any additional mobile phone networks?<br><input type="checkbox"/> 1. Ndio <span style="float: right;">1. Yes</span><br><input type="checkbox"/> 2. La [enda D8] <span style="float: right;">2. No [skip to D8]</span>                                                                                                                                                                                                                                                                                                                                                                                                                                    |
| <b>D7</b>                                                                                                        | <b>Ikiwa ni ndio, mtandao (network) upi mwingine? (Chagua zote zilizotajwa)</b><br>What are the other mobile networks you use? [Check all that are mentioned]<br><input type="checkbox"/> 1. Safaricom <span style="float: right;">1. Safaricom</span><br><input type="checkbox"/> 2. Airtel/Zain <span style="float: right;">2. Airtel/Zain</span><br><input type="checkbox"/> 3. Orange <span style="float: right;">3. Orange</span><br><input type="checkbox"/> 4. Yumobile <span style="float: right;">4. Yumobile</span><br><input type="checkbox"/> 5. Equitel <span style="float: right;">5. Equitel</span><br><input type="checkbox"/> 6. Ingingine, eleza: _____ <span style="float: right;">6. Other, specify: _____</span> |
| <b>D8</b>                                                                                                        | <b>Je, wewe hutuma ujumbe mfupi (SMS)?</b><br>Do you send text messages (SMS)?<br><input type="checkbox"/> 1. Ndio <span style="float: right;">1. Yes</span><br><input type="checkbox"/> 2. La [enda D11] <span style="float: right;">2. No [skip to D11]</span>                                                                                                                                                                                                                                                                                                                                                                                                                                                                      |

Household serial number \_\_\_\_\_

|                                                              |                                                                                                                                                                                                                                                                                                                                                                                                                                                                                                                                                                                                                                   |                                                              |                                 |                                           |                          |                                                              |                                           |                                       |          |                                   |               |
|--------------------------------------------------------------|-----------------------------------------------------------------------------------------------------------------------------------------------------------------------------------------------------------------------------------------------------------------------------------------------------------------------------------------------------------------------------------------------------------------------------------------------------------------------------------------------------------------------------------------------------------------------------------------------------------------------------------|--------------------------------------------------------------|---------------------------------|-------------------------------------------|--------------------------|--------------------------------------------------------------|-------------------------------------------|---------------------------------------|----------|-----------------------------------|---------------|
| <b>D9</b>                                                    | <p><b>Ikiwa ndio, unatuma ujumbe mfupi (SMS) mara ngapi?</b><br/>How frequently do you send text messages/SMS?</p> <table border="0"> <tr> <td><input type="checkbox"/> 1. Nadra</td> <td>1. Rarely</td> </tr> <tr> <td><input type="checkbox"/> 2. Kila mwezi</td> <td>2. Monthly</td> </tr> <tr> <td><input type="checkbox"/> 3. Kila wiki</td> <td>3. Weekly</td> </tr> <tr> <td><input type="checkbox"/> 4. Kila siku</td> <td>4. Daily</td> </tr> </table>                                                                                                                                                                   | <input type="checkbox"/> 1. Nadra                            | 1. Rarely                       | <input type="checkbox"/> 2. Kila mwezi    | 2. Monthly               | <input type="checkbox"/> 3. Kila wiki                        | 3. Weekly                                 | <input type="checkbox"/> 4. Kila siku | 4. Daily |                                   |               |
| <input type="checkbox"/> 1. Nadra                            | 1. Rarely                                                                                                                                                                                                                                                                                                                                                                                                                                                                                                                                                                                                                         |                                                              |                                 |                                           |                          |                                                              |                                           |                                       |          |                                   |               |
| <input type="checkbox"/> 2. Kila mwezi                       | 2. Monthly                                                                                                                                                                                                                                                                                                                                                                                                                                                                                                                                                                                                                        |                                                              |                                 |                                           |                          |                                                              |                                           |                                       |          |                                   |               |
| <input type="checkbox"/> 3. Kila wiki                        | 3. Weekly                                                                                                                                                                                                                                                                                                                                                                                                                                                                                                                                                                                                                         |                                                              |                                 |                                           |                          |                                                              |                                           |                                       |          |                                   |               |
| <input type="checkbox"/> 4. Kila siku                        | 4. Daily                                                                                                                                                                                                                                                                                                                                                                                                                                                                                                                                                                                                                          |                                                              |                                 |                                           |                          |                                                              |                                           |                                       |          |                                   |               |
| <b>D10</b>                                                   | <p><b>Ni mara ngapi huwa una shida ya kutuma ujumbe mfupi (SMS) kutokana na shida za kukosa mtandao?</b><br/>How often do you have problems sending text messages/SMS because of poor network?</p> <table border="0"> <tr> <td><input type="checkbox"/> 1. Nadra</td> <td>1. Rarely</td> </tr> <tr> <td><input type="checkbox"/> 2. Kila mwezi</td> <td>2. Monthly</td> </tr> <tr> <td><input type="checkbox"/> 3. Kila wiki</td> <td>3. Weekly</td> </tr> <tr> <td><input type="checkbox"/> 4. Kila siku</td> <td>4. Daily</td> </tr> <tr> <td><input type="checkbox"/> 5. Sijui</td> <td>5. Don't know</td> </tr> </table>      | <input type="checkbox"/> 1. Nadra                            | 1. Rarely                       | <input type="checkbox"/> 2. Kila mwezi    | 2. Monthly               | <input type="checkbox"/> 3. Kila wiki                        | 3. Weekly                                 | <input type="checkbox"/> 4. Kila siku | 4. Daily | <input type="checkbox"/> 5. Sijui | 5. Don't know |
| <input type="checkbox"/> 1. Nadra                            | 1. Rarely                                                                                                                                                                                                                                                                                                                                                                                                                                                                                                                                                                                                                         |                                                              |                                 |                                           |                          |                                                              |                                           |                                       |          |                                   |               |
| <input type="checkbox"/> 2. Kila mwezi                       | 2. Monthly                                                                                                                                                                                                                                                                                                                                                                                                                                                                                                                                                                                                                        |                                                              |                                 |                                           |                          |                                                              |                                           |                                       |          |                                   |               |
| <input type="checkbox"/> 3. Kila wiki                        | 3. Weekly                                                                                                                                                                                                                                                                                                                                                                                                                                                                                                                                                                                                                         |                                                              |                                 |                                           |                          |                                                              |                                           |                                       |          |                                   |               |
| <input type="checkbox"/> 4. Kila siku                        | 4. Daily                                                                                                                                                                                                                                                                                                                                                                                                                                                                                                                                                                                                                          |                                                              |                                 |                                           |                          |                                                              |                                           |                                       |          |                                   |               |
| <input type="checkbox"/> 5. Sijui                            | 5. Don't know                                                                                                                                                                                                                                                                                                                                                                                                                                                                                                                                                                                                                     |                                                              |                                 |                                           |                          |                                                              |                                           |                                       |          |                                   |               |
| <b>D11</b>                                                   | <p><b>Je, huwa unasoma ujumbe mfupi (SMS) ya matangazo unazopokea?</b><br/>Do you read text message (SMS) advertisements that you receive?</p> <table border="0"> <tr> <td><input type="checkbox"/> 1. Ndio</td> <td>1. Yes</td> </tr> <tr> <td><input type="checkbox"/> 2. Saa zingine</td> <td>2. Sometimes</td> </tr> <tr> <td><input type="checkbox"/> 3. La</td> <td>3. No</td> </tr> </table>                                                                                                                                                                                                                               | <input type="checkbox"/> 1. Ndio                             | 1. Yes                          | <input type="checkbox"/> 2. Saa zingine   | 2. Sometimes             | <input type="checkbox"/> 3. La                               | 3. No                                     |                                       |          |                                   |               |
| <input type="checkbox"/> 1. Ndio                             | 1. Yes                                                                                                                                                                                                                                                                                                                                                                                                                                                                                                                                                                                                                            |                                                              |                                 |                                           |                          |                                                              |                                           |                                       |          |                                   |               |
| <input type="checkbox"/> 2. Saa zingine                      | 2. Sometimes                                                                                                                                                                                                                                                                                                                                                                                                                                                                                                                                                                                                                      |                                                              |                                 |                                           |                          |                                                              |                                           |                                       |          |                                   |               |
| <input type="checkbox"/> 3. La                               | 3. No                                                                                                                                                                                                                                                                                                                                                                                                                                                                                                                                                                                                                             |                                                              |                                 |                                           |                          |                                                              |                                           |                                       |          |                                   |               |
| <b>D12</b>                                                   | <p><b>Je ulipokea ujumbe (SMS) kupitia Kwa simu kuhusu kampeni ya chanjo dhidi ya ukambi-rubella mwezi uliopita?</b><br/>Did you receive a text message (SMS) about the measles-rubella vaccination campaign in the last month?</p> <table border="0"> <tr> <td><input type="checkbox"/> 1. Ndio</td> <td>1. Yes</td> </tr> <tr> <td><input type="checkbox"/> 2. La [enda D17]</td> <td>2. No [skip to D17]</td> </tr> </table>                                                                                                                                                                                                   | <input type="checkbox"/> 1. Ndio                             | 1. Yes                          | <input type="checkbox"/> 2. La [enda D17] | 2. No [skip to D17]      |                                                              |                                           |                                       |          |                                   |               |
| <input type="checkbox"/> 1. Ndio                             | 1. Yes                                                                                                                                                                                                                                                                                                                                                                                                                                                                                                                                                                                                                            |                                                              |                                 |                                           |                          |                                                              |                                           |                                       |          |                                   |               |
| <input type="checkbox"/> 2. La [enda D17]                    | 2. No [skip to D17]                                                                                                                                                                                                                                                                                                                                                                                                                                                                                                                                                                                                               |                                                              |                                 |                                           |                          |                                                              |                                           |                                       |          |                                   |               |
| <b>D13</b>                                                   | <p><b>Ulipokea ujumbe (SMS) ngapi kuhusu kampeni ya chanjo ya ukambi na rubella?</b><br/>How many text messages (SMS) about the measles-rubella vaccination campaign did you receive?</p> <p>Idadi / Number _____</p>                                                                                                                                                                                                                                                                                                                                                                                                             |                                                              |                                 |                                           |                          |                                                              |                                           |                                       |          |                                   |               |
| <b>D14</b>                                                   | <p><b>Je kwa maoni yako, nieleze kuhusu kupokea ujumbe mfupi (SMS) kuhusu kampeni ya chanjo ya ukambi-rubella?</b><br/>What was your opinion about receiving the text messages (SMS) about the measles-rubella vaccination campaign?</p> <table border="0"> <tr> <td><input type="checkbox"/> 1. Mazuri ( walipenda / zilisaidia)</td> <td>1. Favorable (liked it/helpful)</td> </tr> <tr> <td><input type="checkbox"/> 2. Hakuna maoni</td> <td>2. Neutral or no opinion</td> </tr> <tr> <td><input type="checkbox"/> 3. Mbaya ( hawakupenda/ waliudhika)</td> <td>3. Unfavorable (didn't like it/irritated)</td> </tr> </table> | <input type="checkbox"/> 1. Mazuri ( walipenda / zilisaidia) | 1. Favorable (liked it/helpful) | <input type="checkbox"/> 2. Hakuna maoni  | 2. Neutral or no opinion | <input type="checkbox"/> 3. Mbaya ( hawakupenda/ waliudhika) | 3. Unfavorable (didn't like it/irritated) |                                       |          |                                   |               |
| <input type="checkbox"/> 1. Mazuri ( walipenda / zilisaidia) | 1. Favorable (liked it/helpful)                                                                                                                                                                                                                                                                                                                                                                                                                                                                                                                                                                                                   |                                                              |                                 |                                           |                          |                                                              |                                           |                                       |          |                                   |               |
| <input type="checkbox"/> 2. Hakuna maoni                     | 2. Neutral or no opinion                                                                                                                                                                                                                                                                                                                                                                                                                                                                                                                                                                                                          |                                                              |                                 |                                           |                          |                                                              |                                           |                                       |          |                                   |               |
| <input type="checkbox"/> 3. Mbaya ( hawakupenda/ waliudhika) | 3. Unfavorable (didn't like it/irritated)                                                                                                                                                                                                                                                                                                                                                                                                                                                                                                                                                                                         |                                                              |                                 |                                           |                          |                                                              |                                           |                                       |          |                                   |               |
| <b>D15</b>                                                   | <p><b>Maoni yako kuhusu idadi ya ujumbe (SMS) hizo ni yepi?</b><br/>What did you think about the frequency of the messages that you received?</p> <table border="0"> <tr> <td><input type="checkbox"/> 1. Chache sana</td> <td>1. Too few</td> </tr> <tr> <td><input type="checkbox"/> 2. Sawa</td> <td>2. Just right</td> </tr> <tr> <td><input type="checkbox"/> 3. Nyingi sana</td> <td>3. Too many</td> </tr> </table>                                                                                                                                                                                                        | <input type="checkbox"/> 1. Chache sana                      | 1. Too few                      | <input type="checkbox"/> 2. Sawa          | 2. Just right            | <input type="checkbox"/> 3. Nyingi sana                      | 3. Too many                               |                                       |          |                                   |               |
| <input type="checkbox"/> 1. Chache sana                      | 1. Too few                                                                                                                                                                                                                                                                                                                                                                                                                                                                                                                                                                                                                        |                                                              |                                 |                                           |                          |                                                              |                                           |                                       |          |                                   |               |
| <input type="checkbox"/> 2. Sawa                             | 2. Just right                                                                                                                                                                                                                                                                                                                                                                                                                                                                                                                                                                                                                     |                                                              |                                 |                                           |                          |                                                              |                                           |                                       |          |                                   |               |
| <input type="checkbox"/> 3. Nyingi sana                      | 3. Too many                                                                                                                                                                                                                                                                                                                                                                                                                                                                                                                                                                                                                       |                                                              |                                 |                                           |                          |                                                              |                                           |                                       |          |                                   |               |
| <b>D16</b>                                                   | <p><b>Je ulimtumia mtu yeyote ujumbe (SMS) hizo kuhusu kampeni ya chanjo?</b><br/>Did you forward or share a text message (SMS) about the vaccination campaign?</p> <table border="0"> <tr> <td><input type="checkbox"/> 1. Ndio</td> <td>1. Yes</td> </tr> <tr> <td><input type="checkbox"/> 2. La</td> <td>2. No</td> </tr> </table>                                                                                                                                                                                                                                                                                            | <input type="checkbox"/> 1. Ndio                             | 1. Yes                          | <input type="checkbox"/> 2. La            | 2. No                    |                                                              |                                           |                                       |          |                                   |               |
| <input type="checkbox"/> 1. Ndio                             | 1. Yes                                                                                                                                                                                                                                                                                                                                                                                                                                                                                                                                                                                                                            |                                                              |                                 |                                           |                          |                                                              |                                           |                                       |          |                                   |               |
| <input type="checkbox"/> 2. La                               | 2. No                                                                                                                                                                                                                                                                                                                                                                                                                                                                                                                                                                                                                             |                                                              |                                 |                                           |                          |                                                              |                                           |                                       |          |                                   |               |
| <b>D17</b>                                                   | <p><b>Je, kuna rafiki au familia aliyekueleza au kukutumia ujumbe mfupi (SMS) kuhusu kampeni ya chanjo?</b><br/>Did a friend or family member forward or tell you about a text message (SMS) about the vaccination campaign?</p> <table border="0"> <tr> <td><input type="checkbox"/> 1. Ndio</td> <td>1. Yes</td> </tr> <tr> <td><input type="checkbox"/> 2. La</td> <td>2. No</td> </tr> </table>                                                                                                                                                                                                                               | <input type="checkbox"/> 1. Ndio                             | 1. Yes                          | <input type="checkbox"/> 2. La            | 2. No                    |                                                              |                                           |                                       |          |                                   |               |
| <input type="checkbox"/> 1. Ndio                             | 1. Yes                                                                                                                                                                                                                                                                                                                                                                                                                                                                                                                                                                                                                            |                                                              |                                 |                                           |                          |                                                              |                                           |                                       |          |                                   |               |
| <input type="checkbox"/> 2. La                               | 2. No                                                                                                                                                                                                                                                                                                                                                                                                                                                                                                                                                                                                                             |                                                              |                                 |                                           |                          |                                                              |                                           |                                       |          |                                   |               |

Household serial number \_\_\_\_\_ - \_\_\_\_\_

|                                                                                                    |                                                                                                                                                                                                                                                                                                                                                                                                                                                                                                                                                                                                                                                                                                                                                                                                                                                                                                                                                                                                                                                                                                                                                                                                                                                                                                                                                                                                                                                                                                                                                                                                                                                   |                                                           |                               |                                                                      |                                                  |                                                                         |                                                        |                                                         |                                        |                                                          |                                              |                                                                                                    |                                                              |                                                     |                          |
|----------------------------------------------------------------------------------------------------|---------------------------------------------------------------------------------------------------------------------------------------------------------------------------------------------------------------------------------------------------------------------------------------------------------------------------------------------------------------------------------------------------------------------------------------------------------------------------------------------------------------------------------------------------------------------------------------------------------------------------------------------------------------------------------------------------------------------------------------------------------------------------------------------------------------------------------------------------------------------------------------------------------------------------------------------------------------------------------------------------------------------------------------------------------------------------------------------------------------------------------------------------------------------------------------------------------------------------------------------------------------------------------------------------------------------------------------------------------------------------------------------------------------------------------------------------------------------------------------------------------------------------------------------------------------------------------------------------------------------------------------------------|-----------------------------------------------------------|-------------------------------|----------------------------------------------------------------------|--------------------------------------------------|-------------------------------------------------------------------------|--------------------------------------------------------|---------------------------------------------------------|----------------------------------------|----------------------------------------------------------|----------------------------------------------|----------------------------------------------------------------------------------------------------|--------------------------------------------------------------|-----------------------------------------------------|--------------------------|
| <b>D18</b>                                                                                         | <p><b>Je, ujumbe mfupi (SMS) ilikusaidia katika uamuzi wa kupata chanjo kwa mtoto wako?</b><br/>Was a text message (SMS) useful in making your decision to vaccinate your child?</p> <p><input type="checkbox"/> 1. Ndio <span style="float: right;">1. Yes</span><br/><input type="checkbox"/> 2. La [enda E1] <span style="float: right;">2. No [skip to E1]</span></p>                                                                                                                                                                                                                                                                                                                                                                                                                                                                                                                                                                                                                                                                                                                                                                                                                                                                                                                                                                                                                                                                                                                                                                                                                                                                         |                                                           |                               |                                                                      |                                                  |                                                                         |                                                        |                                                         |                                        |                                                          |                                              |                                                                                                    |                                                              |                                                     |                          |
| <b>D19</b>                                                                                         | <p><b>Ujumbe (SMS) huo ulikusaidia vipi katika kufanya uamuzi kuhusu chanjo ya mtoto wako? [Chagua zote zinazotajwa]</b><br/>How did text messages (SMS) help you make a decision to vaccinate your child? (Select all that apply.)</p> <table style="width: 100%; border: none;"> <tr> <td style="width: 50%; border: none;"><input type="checkbox"/> 1. Ilinifahamisha kuhusu kampeni</td> <td style="width: 50%; border: none;">1. Made aware of the campaign</td> </tr> <tr> <td style="border: none;"><input type="checkbox"/> 2. Ilinielezea wapi/wakati chanjo itapeanwa</td> <td style="border: none;">2. Provided place/ time for campaign vaccination</td> </tr> <tr> <td style="border: none;"><input type="checkbox"/> 3. Ilinikumbusha kupeleka watoto kwenye chanjo</td> <td style="border: none;">3. Reminded to bring children for campaign vaccination</td> </tr> <tr> <td style="border: none;"><input type="checkbox"/> 4. Iliondoa hofu kuhusu chanjo</td> <td style="border: none;">4. Relieved concerns about vaccination</td> </tr> <tr> <td style="border: none;"><input type="checkbox"/> 5. Ilinieleza umuhimu wa chanjo</td> <td style="border: none;">5. Explained importance of receiving vaccine</td> </tr> <tr> <td style="border: none;"><input type="checkbox"/> 6. Ilihakikisha chanjo inapeanwa na shirika inayoaminika (Wizara ya Afya)</td> <td style="border: none;">6. Verified that vaccine is provided by trusted source (MOH)</td> </tr> <tr> <td style="border: none;"><input type="checkbox"/> 7. Ingingine, eleza: _____</td> <td style="border: none;">7. Other (specify) _____</td> </tr> </table> | <input type="checkbox"/> 1. Ilinifahamisha kuhusu kampeni | 1. Made aware of the campaign | <input type="checkbox"/> 2. Ilinielezea wapi/wakati chanjo itapeanwa | 2. Provided place/ time for campaign vaccination | <input type="checkbox"/> 3. Ilinikumbusha kupeleka watoto kwenye chanjo | 3. Reminded to bring children for campaign vaccination | <input type="checkbox"/> 4. Iliondoa hofu kuhusu chanjo | 4. Relieved concerns about vaccination | <input type="checkbox"/> 5. Ilinieleza umuhimu wa chanjo | 5. Explained importance of receiving vaccine | <input type="checkbox"/> 6. Ilihakikisha chanjo inapeanwa na shirika inayoaminika (Wizara ya Afya) | 6. Verified that vaccine is provided by trusted source (MOH) | <input type="checkbox"/> 7. Ingingine, eleza: _____ | 7. Other (specify) _____ |
| <input type="checkbox"/> 1. Ilinifahamisha kuhusu kampeni                                          | 1. Made aware of the campaign                                                                                                                                                                                                                                                                                                                                                                                                                                                                                                                                                                                                                                                                                                                                                                                                                                                                                                                                                                                                                                                                                                                                                                                                                                                                                                                                                                                                                                                                                                                                                                                                                     |                                                           |                               |                                                                      |                                                  |                                                                         |                                                        |                                                         |                                        |                                                          |                                              |                                                                                                    |                                                              |                                                     |                          |
| <input type="checkbox"/> 2. Ilinielezea wapi/wakati chanjo itapeanwa                               | 2. Provided place/ time for campaign vaccination                                                                                                                                                                                                                                                                                                                                                                                                                                                                                                                                                                                                                                                                                                                                                                                                                                                                                                                                                                                                                                                                                                                                                                                                                                                                                                                                                                                                                                                                                                                                                                                                  |                                                           |                               |                                                                      |                                                  |                                                                         |                                                        |                                                         |                                        |                                                          |                                              |                                                                                                    |                                                              |                                                     |                          |
| <input type="checkbox"/> 3. Ilinikumbusha kupeleka watoto kwenye chanjo                            | 3. Reminded to bring children for campaign vaccination                                                                                                                                                                                                                                                                                                                                                                                                                                                                                                                                                                                                                                                                                                                                                                                                                                                                                                                                                                                                                                                                                                                                                                                                                                                                                                                                                                                                                                                                                                                                                                                            |                                                           |                               |                                                                      |                                                  |                                                                         |                                                        |                                                         |                                        |                                                          |                                              |                                                                                                    |                                                              |                                                     |                          |
| <input type="checkbox"/> 4. Iliondoa hofu kuhusu chanjo                                            | 4. Relieved concerns about vaccination                                                                                                                                                                                                                                                                                                                                                                                                                                                                                                                                                                                                                                                                                                                                                                                                                                                                                                                                                                                                                                                                                                                                                                                                                                                                                                                                                                                                                                                                                                                                                                                                            |                                                           |                               |                                                                      |                                                  |                                                                         |                                                        |                                                         |                                        |                                                          |                                              |                                                                                                    |                                                              |                                                     |                          |
| <input type="checkbox"/> 5. Ilinieleza umuhimu wa chanjo                                           | 5. Explained importance of receiving vaccine                                                                                                                                                                                                                                                                                                                                                                                                                                                                                                                                                                                                                                                                                                                                                                                                                                                                                                                                                                                                                                                                                                                                                                                                                                                                                                                                                                                                                                                                                                                                                                                                      |                                                           |                               |                                                                      |                                                  |                                                                         |                                                        |                                                         |                                        |                                                          |                                              |                                                                                                    |                                                              |                                                     |                          |
| <input type="checkbox"/> 6. Ilihakikisha chanjo inapeanwa na shirika inayoaminika (Wizara ya Afya) | 6. Verified that vaccine is provided by trusted source (MOH)                                                                                                                                                                                                                                                                                                                                                                                                                                                                                                                                                                                                                                                                                                                                                                                                                                                                                                                                                                                                                                                                                                                                                                                                                                                                                                                                                                                                                                                                                                                                                                                      |                                                           |                               |                                                                      |                                                  |                                                                         |                                                        |                                                         |                                        |                                                          |                                              |                                                                                                    |                                                              |                                                     |                          |
| <input type="checkbox"/> 7. Ingingine, eleza: _____                                                | 7. Other (specify) _____                                                                                                                                                                                                                                                                                                                                                                                                                                                                                                                                                                                                                                                                                                                                                                                                                                                                                                                                                                                                                                                                                                                                                                                                                                                                                                                                                                                                                                                                                                                                                                                                                          |                                                           |                               |                                                                      |                                                  |                                                                         |                                                        |                                                         |                                        |                                                          |                                              |                                                                                                    |                                                              |                                                     |                          |

**Sehemu ya E: Kuhusu familia / Section E: Household characteristics**

**Kwa kumalizia, ningependa kukuuliza kuhusu familia yako**

“Finally, I’d like to ask some information about the household.”

|                                                            |                                                                                                                                                                                                                                                                                                                                                                                                                                                                                                                                                                                                                                                                                                                                                                                                                                                                                                                                                                                                                                                                                                                                                                                                                                                                                                                                                                                                                                                                                                                                                                                                                                                                                                                                                                                                                                                                                                                                                                                                                                                                                                                                                                                                                                                                                                                                                                                                                                                                                                                                                                                                                                                                                |                                      |                 |                                                            |                                     |                                                       |                                 |                                            |              |                                                     |                   |                                        |             |                                                     |                          |                                      |           |                                     |          |                                      |           |                                       |         |                                         |              |                                      |            |                                     |          |                                          |               |                                      |           |                                       |            |                                        |             |                                                      |                          |
|------------------------------------------------------------|--------------------------------------------------------------------------------------------------------------------------------------------------------------------------------------------------------------------------------------------------------------------------------------------------------------------------------------------------------------------------------------------------------------------------------------------------------------------------------------------------------------------------------------------------------------------------------------------------------------------------------------------------------------------------------------------------------------------------------------------------------------------------------------------------------------------------------------------------------------------------------------------------------------------------------------------------------------------------------------------------------------------------------------------------------------------------------------------------------------------------------------------------------------------------------------------------------------------------------------------------------------------------------------------------------------------------------------------------------------------------------------------------------------------------------------------------------------------------------------------------------------------------------------------------------------------------------------------------------------------------------------------------------------------------------------------------------------------------------------------------------------------------------------------------------------------------------------------------------------------------------------------------------------------------------------------------------------------------------------------------------------------------------------------------------------------------------------------------------------------------------------------------------------------------------------------------------------------------------------------------------------------------------------------------------------------------------------------------------------------------------------------------------------------------------------------------------------------------------------------------------------------------------------------------------------------------------------------------------------------------------------------------------------------------------|--------------------------------------|-----------------|------------------------------------------------------------|-------------------------------------|-------------------------------------------------------|---------------------------------|--------------------------------------------|--------------|-----------------------------------------------------|-------------------|----------------------------------------|-------------|-----------------------------------------------------|--------------------------|--------------------------------------|-----------|-------------------------------------|----------|--------------------------------------|-----------|---------------------------------------|---------|-----------------------------------------|--------------|--------------------------------------|------------|-------------------------------------|----------|------------------------------------------|---------------|--------------------------------------|-----------|---------------------------------------|------------|----------------------------------------|-------------|------------------------------------------------------|--------------------------|
| <b>E1</b>                                                  | <p><b>Kiwango cha juu cha masomo ya mama/Mlezi ni kipi?</b><br/>What is the highest level of education attained by the mother/caretaker?</p> <table style="width: 100%; border: none;"> <tr> <td style="width: 50%; border: none;"><input type="checkbox"/> 1. Hajasoma</td> <td style="width: 50%; border: none;">1. No education</td> </tr> <tr> <td style="border: none;"><input type="checkbox"/> 2. Shule ya msingi, hajakamilisha</td> <td style="border: none;">2. Primary education- not completed</td> </tr> <tr> <td style="border: none;"><input type="checkbox"/> 3. Shule ya msinigi kamilifu</td> <td style="border: none;">3. Primary education- completed</td> </tr> <tr> <td style="border: none;"><input type="checkbox"/> 4. Shule ya upili</td> <td style="border: none;">4. Secondary</td> </tr> <tr> <td style="border: none;"><input type="checkbox"/> 5. Zaidi ya shule ya upili</td> <td style="border: none;">5. Post-secondary</td> </tr> <tr> <td style="border: none;"><input type="checkbox"/> 6. Madrasa</td> <td style="border: none;">6. Madrasa</td> </tr> <tr> <td style="border: none;"><input type="checkbox"/> 7. Ingingine, eleza: _____</td> <td style="border: none;">7. Other (specify) _____</td> </tr> </table>                                                                                                                                                                                                                                                                                                                                                                                                                                                                                                                                                                                                                                                                                                                                                                                                                                                                                                                                                                                                                                                                                                                                                                                                                                                                                                                                                                                                                    | <input type="checkbox"/> 1. Hajasoma | 1. No education | <input type="checkbox"/> 2. Shule ya msingi, hajakamilisha | 2. Primary education- not completed | <input type="checkbox"/> 3. Shule ya msinigi kamilifu | 3. Primary education- completed | <input type="checkbox"/> 4. Shule ya upili | 4. Secondary | <input type="checkbox"/> 5. Zaidi ya shule ya upili | 5. Post-secondary | <input type="checkbox"/> 6. Madrasa    | 6. Madrasa  | <input type="checkbox"/> 7. Ingingine, eleza: _____ | 7. Other (specify) _____ |                                      |           |                                     |          |                                      |           |                                       |         |                                         |              |                                      |            |                                     |          |                                          |               |                                      |           |                                       |            |                                        |             |                                                      |                          |
| <input type="checkbox"/> 1. Hajasoma                       | 1. No education                                                                                                                                                                                                                                                                                                                                                                                                                                                                                                                                                                                                                                                                                                                                                                                                                                                                                                                                                                                                                                                                                                                                                                                                                                                                                                                                                                                                                                                                                                                                                                                                                                                                                                                                                                                                                                                                                                                                                                                                                                                                                                                                                                                                                                                                                                                                                                                                                                                                                                                                                                                                                                                                |                                      |                 |                                                            |                                     |                                                       |                                 |                                            |              |                                                     |                   |                                        |             |                                                     |                          |                                      |           |                                     |          |                                      |           |                                       |         |                                         |              |                                      |            |                                     |          |                                          |               |                                      |           |                                       |            |                                        |             |                                                      |                          |
| <input type="checkbox"/> 2. Shule ya msingi, hajakamilisha | 2. Primary education- not completed                                                                                                                                                                                                                                                                                                                                                                                                                                                                                                                                                                                                                                                                                                                                                                                                                                                                                                                                                                                                                                                                                                                                                                                                                                                                                                                                                                                                                                                                                                                                                                                                                                                                                                                                                                                                                                                                                                                                                                                                                                                                                                                                                                                                                                                                                                                                                                                                                                                                                                                                                                                                                                            |                                      |                 |                                                            |                                     |                                                       |                                 |                                            |              |                                                     |                   |                                        |             |                                                     |                          |                                      |           |                                     |          |                                      |           |                                       |         |                                         |              |                                      |            |                                     |          |                                          |               |                                      |           |                                       |            |                                        |             |                                                      |                          |
| <input type="checkbox"/> 3. Shule ya msinigi kamilifu      | 3. Primary education- completed                                                                                                                                                                                                                                                                                                                                                                                                                                                                                                                                                                                                                                                                                                                                                                                                                                                                                                                                                                                                                                                                                                                                                                                                                                                                                                                                                                                                                                                                                                                                                                                                                                                                                                                                                                                                                                                                                                                                                                                                                                                                                                                                                                                                                                                                                                                                                                                                                                                                                                                                                                                                                                                |                                      |                 |                                                            |                                     |                                                       |                                 |                                            |              |                                                     |                   |                                        |             |                                                     |                          |                                      |           |                                     |          |                                      |           |                                       |         |                                         |              |                                      |            |                                     |          |                                          |               |                                      |           |                                       |            |                                        |             |                                                      |                          |
| <input type="checkbox"/> 4. Shule ya upili                 | 4. Secondary                                                                                                                                                                                                                                                                                                                                                                                                                                                                                                                                                                                                                                                                                                                                                                                                                                                                                                                                                                                                                                                                                                                                                                                                                                                                                                                                                                                                                                                                                                                                                                                                                                                                                                                                                                                                                                                                                                                                                                                                                                                                                                                                                                                                                                                                                                                                                                                                                                                                                                                                                                                                                                                                   |                                      |                 |                                                            |                                     |                                                       |                                 |                                            |              |                                                     |                   |                                        |             |                                                     |                          |                                      |           |                                     |          |                                      |           |                                       |         |                                         |              |                                      |            |                                     |          |                                          |               |                                      |           |                                       |            |                                        |             |                                                      |                          |
| <input type="checkbox"/> 5. Zaidi ya shule ya upili        | 5. Post-secondary                                                                                                                                                                                                                                                                                                                                                                                                                                                                                                                                                                                                                                                                                                                                                                                                                                                                                                                                                                                                                                                                                                                                                                                                                                                                                                                                                                                                                                                                                                                                                                                                                                                                                                                                                                                                                                                                                                                                                                                                                                                                                                                                                                                                                                                                                                                                                                                                                                                                                                                                                                                                                                                              |                                      |                 |                                                            |                                     |                                                       |                                 |                                            |              |                                                     |                   |                                        |             |                                                     |                          |                                      |           |                                     |          |                                      |           |                                       |         |                                         |              |                                      |            |                                     |          |                                          |               |                                      |           |                                       |            |                                        |             |                                                      |                          |
| <input type="checkbox"/> 6. Madrasa                        | 6. Madrasa                                                                                                                                                                                                                                                                                                                                                                                                                                                                                                                                                                                                                                                                                                                                                                                                                                                                                                                                                                                                                                                                                                                                                                                                                                                                                                                                                                                                                                                                                                                                                                                                                                                                                                                                                                                                                                                                                                                                                                                                                                                                                                                                                                                                                                                                                                                                                                                                                                                                                                                                                                                                                                                                     |                                      |                 |                                                            |                                     |                                                       |                                 |                                            |              |                                                     |                   |                                        |             |                                                     |                          |                                      |           |                                     |          |                                      |           |                                       |         |                                         |              |                                      |            |                                     |          |                                          |               |                                      |           |                                       |            |                                        |             |                                                      |                          |
| <input type="checkbox"/> 7. Ingingine, eleza: _____        | 7. Other (specify) _____                                                                                                                                                                                                                                                                                                                                                                                                                                                                                                                                                                                                                                                                                                                                                                                                                                                                                                                                                                                                                                                                                                                                                                                                                                                                                                                                                                                                                                                                                                                                                                                                                                                                                                                                                                                                                                                                                                                                                                                                                                                                                                                                                                                                                                                                                                                                                                                                                                                                                                                                                                                                                                                       |                                      |                 |                                                            |                                     |                                                       |                                 |                                            |              |                                                     |                   |                                        |             |                                                     |                          |                                      |           |                                     |          |                                      |           |                                       |         |                                         |              |                                      |            |                                     |          |                                          |               |                                      |           |                                       |            |                                        |             |                                                      |                          |
| <b>E2</b>                                                  | <p><b>Je, unaweza kuzungumza na kuandika lugha ngapi? [Chagua zote zinazotajwa]</b><br/>What languages can the mother/caretaker read and write? [Select all that apply]</p> <table style="width: 100%; border: none;"> <tr> <td style="width: 50%; border: none;"><input type="checkbox"/> 1. Hakuna</td> <td style="width: 50%; border: none;">1. None</td> </tr> <tr> <td style="border: none;"><input type="checkbox"/> 2. Kiswahili</td> <td style="border: none;">2. Kiswahili</td> </tr> <tr> <td style="border: none;"><input type="checkbox"/> 3. Kingeresa</td> <td style="border: none;">3. English</td> </tr> <tr> <td style="border: none;"><input type="checkbox"/> 4. Kiborana</td> <td style="border: none;">4. Borana</td> </tr> <tr> <td style="border: none;"><input type="checkbox"/> 5. Kiembu</td> <td style="border: none;">5. Embu</td> </tr> <tr> <td style="border: none;"><input type="checkbox"/> 6. Kikalenjin</td> <td style="border: none;">6. Kalenjin</td> </tr> <tr> <td style="border: none;"><input type="checkbox"/> 7. Kikamba</td> <td style="border: none;">7. Kamba</td> </tr> <tr> <td style="border: none;"><input type="checkbox"/> 8. Kikikuyu</td> <td style="border: none;">8. Kikuyu</td> </tr> <tr> <td style="border: none;"><input type="checkbox"/> 9. Kikisii</td> <td style="border: none;">9. Kisii</td> </tr> <tr> <td style="border: none;"><input type="checkbox"/> 10. Kiluhya</td> <td style="border: none;">10. Luhya</td> </tr> <tr> <td style="border: none;"><input type="checkbox"/> 11. Kidhuluo</td> <td style="border: none;">11. Luo</td> </tr> <tr> <td style="border: none;"><input type="checkbox"/> 12. Kimaragoli</td> <td style="border: none;">12. Maragoli</td> </tr> <tr> <td style="border: none;"><input type="checkbox"/> 13. Kimaasi</td> <td style="border: none;">13. Maasai</td> </tr> <tr> <td style="border: none;"><input type="checkbox"/> 14. Kimeru</td> <td style="border: none;">14. Meru</td> </tr> <tr> <td style="border: none;"><input type="checkbox"/> 15. Kimijikenda</td> <td style="border: none;">15. Mijikenda</td> </tr> <tr> <td style="border: none;"><input type="checkbox"/> 16. Kipokot</td> <td style="border: none;">16. Pokot</td> </tr> <tr> <td style="border: none;"><input type="checkbox"/> 17. Kisomali</td> <td style="border: none;">17. Somali</td> </tr> <tr> <td style="border: none;"><input type="checkbox"/> 18. Kiturkana</td> <td style="border: none;">18. Turkana</td> </tr> <tr> <td style="border: none;"><input type="checkbox"/> 19. Ingingine (eleza) _____</td> <td style="border: none;">19. Other (ingine) _____</td> </tr> </table> | <input type="checkbox"/> 1. Hakuna   | 1. None         | <input type="checkbox"/> 2. Kiswahili                      | 2. Kiswahili                        | <input type="checkbox"/> 3. Kingeresa                 | 3. English                      | <input type="checkbox"/> 4. Kiborana       | 4. Borana    | <input type="checkbox"/> 5. Kiembu                  | 5. Embu           | <input type="checkbox"/> 6. Kikalenjin | 6. Kalenjin | <input type="checkbox"/> 7. Kikamba                 | 7. Kamba                 | <input type="checkbox"/> 8. Kikikuyu | 8. Kikuyu | <input type="checkbox"/> 9. Kikisii | 9. Kisii | <input type="checkbox"/> 10. Kiluhya | 10. Luhya | <input type="checkbox"/> 11. Kidhuluo | 11. Luo | <input type="checkbox"/> 12. Kimaragoli | 12. Maragoli | <input type="checkbox"/> 13. Kimaasi | 13. Maasai | <input type="checkbox"/> 14. Kimeru | 14. Meru | <input type="checkbox"/> 15. Kimijikenda | 15. Mijikenda | <input type="checkbox"/> 16. Kipokot | 16. Pokot | <input type="checkbox"/> 17. Kisomali | 17. Somali | <input type="checkbox"/> 18. Kiturkana | 18. Turkana | <input type="checkbox"/> 19. Ingingine (eleza) _____ | 19. Other (ingine) _____ |
| <input type="checkbox"/> 1. Hakuna                         | 1. None                                                                                                                                                                                                                                                                                                                                                                                                                                                                                                                                                                                                                                                                                                                                                                                                                                                                                                                                                                                                                                                                                                                                                                                                                                                                                                                                                                                                                                                                                                                                                                                                                                                                                                                                                                                                                                                                                                                                                                                                                                                                                                                                                                                                                                                                                                                                                                                                                                                                                                                                                                                                                                                                        |                                      |                 |                                                            |                                     |                                                       |                                 |                                            |              |                                                     |                   |                                        |             |                                                     |                          |                                      |           |                                     |          |                                      |           |                                       |         |                                         |              |                                      |            |                                     |          |                                          |               |                                      |           |                                       |            |                                        |             |                                                      |                          |
| <input type="checkbox"/> 2. Kiswahili                      | 2. Kiswahili                                                                                                                                                                                                                                                                                                                                                                                                                                                                                                                                                                                                                                                                                                                                                                                                                                                                                                                                                                                                                                                                                                                                                                                                                                                                                                                                                                                                                                                                                                                                                                                                                                                                                                                                                                                                                                                                                                                                                                                                                                                                                                                                                                                                                                                                                                                                                                                                                                                                                                                                                                                                                                                                   |                                      |                 |                                                            |                                     |                                                       |                                 |                                            |              |                                                     |                   |                                        |             |                                                     |                          |                                      |           |                                     |          |                                      |           |                                       |         |                                         |              |                                      |            |                                     |          |                                          |               |                                      |           |                                       |            |                                        |             |                                                      |                          |
| <input type="checkbox"/> 3. Kingeresa                      | 3. English                                                                                                                                                                                                                                                                                                                                                                                                                                                                                                                                                                                                                                                                                                                                                                                                                                                                                                                                                                                                                                                                                                                                                                                                                                                                                                                                                                                                                                                                                                                                                                                                                                                                                                                                                                                                                                                                                                                                                                                                                                                                                                                                                                                                                                                                                                                                                                                                                                                                                                                                                                                                                                                                     |                                      |                 |                                                            |                                     |                                                       |                                 |                                            |              |                                                     |                   |                                        |             |                                                     |                          |                                      |           |                                     |          |                                      |           |                                       |         |                                         |              |                                      |            |                                     |          |                                          |               |                                      |           |                                       |            |                                        |             |                                                      |                          |
| <input type="checkbox"/> 4. Kiborana                       | 4. Borana                                                                                                                                                                                                                                                                                                                                                                                                                                                                                                                                                                                                                                                                                                                                                                                                                                                                                                                                                                                                                                                                                                                                                                                                                                                                                                                                                                                                                                                                                                                                                                                                                                                                                                                                                                                                                                                                                                                                                                                                                                                                                                                                                                                                                                                                                                                                                                                                                                                                                                                                                                                                                                                                      |                                      |                 |                                                            |                                     |                                                       |                                 |                                            |              |                                                     |                   |                                        |             |                                                     |                          |                                      |           |                                     |          |                                      |           |                                       |         |                                         |              |                                      |            |                                     |          |                                          |               |                                      |           |                                       |            |                                        |             |                                                      |                          |
| <input type="checkbox"/> 5. Kiembu                         | 5. Embu                                                                                                                                                                                                                                                                                                                                                                                                                                                                                                                                                                                                                                                                                                                                                                                                                                                                                                                                                                                                                                                                                                                                                                                                                                                                                                                                                                                                                                                                                                                                                                                                                                                                                                                                                                                                                                                                                                                                                                                                                                                                                                                                                                                                                                                                                                                                                                                                                                                                                                                                                                                                                                                                        |                                      |                 |                                                            |                                     |                                                       |                                 |                                            |              |                                                     |                   |                                        |             |                                                     |                          |                                      |           |                                     |          |                                      |           |                                       |         |                                         |              |                                      |            |                                     |          |                                          |               |                                      |           |                                       |            |                                        |             |                                                      |                          |
| <input type="checkbox"/> 6. Kikalenjin                     | 6. Kalenjin                                                                                                                                                                                                                                                                                                                                                                                                                                                                                                                                                                                                                                                                                                                                                                                                                                                                                                                                                                                                                                                                                                                                                                                                                                                                                                                                                                                                                                                                                                                                                                                                                                                                                                                                                                                                                                                                                                                                                                                                                                                                                                                                                                                                                                                                                                                                                                                                                                                                                                                                                                                                                                                                    |                                      |                 |                                                            |                                     |                                                       |                                 |                                            |              |                                                     |                   |                                        |             |                                                     |                          |                                      |           |                                     |          |                                      |           |                                       |         |                                         |              |                                      |            |                                     |          |                                          |               |                                      |           |                                       |            |                                        |             |                                                      |                          |
| <input type="checkbox"/> 7. Kikamba                        | 7. Kamba                                                                                                                                                                                                                                                                                                                                                                                                                                                                                                                                                                                                                                                                                                                                                                                                                                                                                                                                                                                                                                                                                                                                                                                                                                                                                                                                                                                                                                                                                                                                                                                                                                                                                                                                                                                                                                                                                                                                                                                                                                                                                                                                                                                                                                                                                                                                                                                                                                                                                                                                                                                                                                                                       |                                      |                 |                                                            |                                     |                                                       |                                 |                                            |              |                                                     |                   |                                        |             |                                                     |                          |                                      |           |                                     |          |                                      |           |                                       |         |                                         |              |                                      |            |                                     |          |                                          |               |                                      |           |                                       |            |                                        |             |                                                      |                          |
| <input type="checkbox"/> 8. Kikikuyu                       | 8. Kikuyu                                                                                                                                                                                                                                                                                                                                                                                                                                                                                                                                                                                                                                                                                                                                                                                                                                                                                                                                                                                                                                                                                                                                                                                                                                                                                                                                                                                                                                                                                                                                                                                                                                                                                                                                                                                                                                                                                                                                                                                                                                                                                                                                                                                                                                                                                                                                                                                                                                                                                                                                                                                                                                                                      |                                      |                 |                                                            |                                     |                                                       |                                 |                                            |              |                                                     |                   |                                        |             |                                                     |                          |                                      |           |                                     |          |                                      |           |                                       |         |                                         |              |                                      |            |                                     |          |                                          |               |                                      |           |                                       |            |                                        |             |                                                      |                          |
| <input type="checkbox"/> 9. Kikisii                        | 9. Kisii                                                                                                                                                                                                                                                                                                                                                                                                                                                                                                                                                                                                                                                                                                                                                                                                                                                                                                                                                                                                                                                                                                                                                                                                                                                                                                                                                                                                                                                                                                                                                                                                                                                                                                                                                                                                                                                                                                                                                                                                                                                                                                                                                                                                                                                                                                                                                                                                                                                                                                                                                                                                                                                                       |                                      |                 |                                                            |                                     |                                                       |                                 |                                            |              |                                                     |                   |                                        |             |                                                     |                          |                                      |           |                                     |          |                                      |           |                                       |         |                                         |              |                                      |            |                                     |          |                                          |               |                                      |           |                                       |            |                                        |             |                                                      |                          |
| <input type="checkbox"/> 10. Kiluhya                       | 10. Luhya                                                                                                                                                                                                                                                                                                                                                                                                                                                                                                                                                                                                                                                                                                                                                                                                                                                                                                                                                                                                                                                                                                                                                                                                                                                                                                                                                                                                                                                                                                                                                                                                                                                                                                                                                                                                                                                                                                                                                                                                                                                                                                                                                                                                                                                                                                                                                                                                                                                                                                                                                                                                                                                                      |                                      |                 |                                                            |                                     |                                                       |                                 |                                            |              |                                                     |                   |                                        |             |                                                     |                          |                                      |           |                                     |          |                                      |           |                                       |         |                                         |              |                                      |            |                                     |          |                                          |               |                                      |           |                                       |            |                                        |             |                                                      |                          |
| <input type="checkbox"/> 11. Kidhuluo                      | 11. Luo                                                                                                                                                                                                                                                                                                                                                                                                                                                                                                                                                                                                                                                                                                                                                                                                                                                                                                                                                                                                                                                                                                                                                                                                                                                                                                                                                                                                                                                                                                                                                                                                                                                                                                                                                                                                                                                                                                                                                                                                                                                                                                                                                                                                                                                                                                                                                                                                                                                                                                                                                                                                                                                                        |                                      |                 |                                                            |                                     |                                                       |                                 |                                            |              |                                                     |                   |                                        |             |                                                     |                          |                                      |           |                                     |          |                                      |           |                                       |         |                                         |              |                                      |            |                                     |          |                                          |               |                                      |           |                                       |            |                                        |             |                                                      |                          |
| <input type="checkbox"/> 12. Kimaragoli                    | 12. Maragoli                                                                                                                                                                                                                                                                                                                                                                                                                                                                                                                                                                                                                                                                                                                                                                                                                                                                                                                                                                                                                                                                                                                                                                                                                                                                                                                                                                                                                                                                                                                                                                                                                                                                                                                                                                                                                                                                                                                                                                                                                                                                                                                                                                                                                                                                                                                                                                                                                                                                                                                                                                                                                                                                   |                                      |                 |                                                            |                                     |                                                       |                                 |                                            |              |                                                     |                   |                                        |             |                                                     |                          |                                      |           |                                     |          |                                      |           |                                       |         |                                         |              |                                      |            |                                     |          |                                          |               |                                      |           |                                       |            |                                        |             |                                                      |                          |
| <input type="checkbox"/> 13. Kimaasi                       | 13. Maasai                                                                                                                                                                                                                                                                                                                                                                                                                                                                                                                                                                                                                                                                                                                                                                                                                                                                                                                                                                                                                                                                                                                                                                                                                                                                                                                                                                                                                                                                                                                                                                                                                                                                                                                                                                                                                                                                                                                                                                                                                                                                                                                                                                                                                                                                                                                                                                                                                                                                                                                                                                                                                                                                     |                                      |                 |                                                            |                                     |                                                       |                                 |                                            |              |                                                     |                   |                                        |             |                                                     |                          |                                      |           |                                     |          |                                      |           |                                       |         |                                         |              |                                      |            |                                     |          |                                          |               |                                      |           |                                       |            |                                        |             |                                                      |                          |
| <input type="checkbox"/> 14. Kimeru                        | 14. Meru                                                                                                                                                                                                                                                                                                                                                                                                                                                                                                                                                                                                                                                                                                                                                                                                                                                                                                                                                                                                                                                                                                                                                                                                                                                                                                                                                                                                                                                                                                                                                                                                                                                                                                                                                                                                                                                                                                                                                                                                                                                                                                                                                                                                                                                                                                                                                                                                                                                                                                                                                                                                                                                                       |                                      |                 |                                                            |                                     |                                                       |                                 |                                            |              |                                                     |                   |                                        |             |                                                     |                          |                                      |           |                                     |          |                                      |           |                                       |         |                                         |              |                                      |            |                                     |          |                                          |               |                                      |           |                                       |            |                                        |             |                                                      |                          |
| <input type="checkbox"/> 15. Kimijikenda                   | 15. Mijikenda                                                                                                                                                                                                                                                                                                                                                                                                                                                                                                                                                                                                                                                                                                                                                                                                                                                                                                                                                                                                                                                                                                                                                                                                                                                                                                                                                                                                                                                                                                                                                                                                                                                                                                                                                                                                                                                                                                                                                                                                                                                                                                                                                                                                                                                                                                                                                                                                                                                                                                                                                                                                                                                                  |                                      |                 |                                                            |                                     |                                                       |                                 |                                            |              |                                                     |                   |                                        |             |                                                     |                          |                                      |           |                                     |          |                                      |           |                                       |         |                                         |              |                                      |            |                                     |          |                                          |               |                                      |           |                                       |            |                                        |             |                                                      |                          |
| <input type="checkbox"/> 16. Kipokot                       | 16. Pokot                                                                                                                                                                                                                                                                                                                                                                                                                                                                                                                                                                                                                                                                                                                                                                                                                                                                                                                                                                                                                                                                                                                                                                                                                                                                                                                                                                                                                                                                                                                                                                                                                                                                                                                                                                                                                                                                                                                                                                                                                                                                                                                                                                                                                                                                                                                                                                                                                                                                                                                                                                                                                                                                      |                                      |                 |                                                            |                                     |                                                       |                                 |                                            |              |                                                     |                   |                                        |             |                                                     |                          |                                      |           |                                     |          |                                      |           |                                       |         |                                         |              |                                      |            |                                     |          |                                          |               |                                      |           |                                       |            |                                        |             |                                                      |                          |
| <input type="checkbox"/> 17. Kisomali                      | 17. Somali                                                                                                                                                                                                                                                                                                                                                                                                                                                                                                                                                                                                                                                                                                                                                                                                                                                                                                                                                                                                                                                                                                                                                                                                                                                                                                                                                                                                                                                                                                                                                                                                                                                                                                                                                                                                                                                                                                                                                                                                                                                                                                                                                                                                                                                                                                                                                                                                                                                                                                                                                                                                                                                                     |                                      |                 |                                                            |                                     |                                                       |                                 |                                            |              |                                                     |                   |                                        |             |                                                     |                          |                                      |           |                                     |          |                                      |           |                                       |         |                                         |              |                                      |            |                                     |          |                                          |               |                                      |           |                                       |            |                                        |             |                                                      |                          |
| <input type="checkbox"/> 18. Kiturkana                     | 18. Turkana                                                                                                                                                                                                                                                                                                                                                                                                                                                                                                                                                                                                                                                                                                                                                                                                                                                                                                                                                                                                                                                                                                                                                                                                                                                                                                                                                                                                                                                                                                                                                                                                                                                                                                                                                                                                                                                                                                                                                                                                                                                                                                                                                                                                                                                                                                                                                                                                                                                                                                                                                                                                                                                                    |                                      |                 |                                                            |                                     |                                                       |                                 |                                            |              |                                                     |                   |                                        |             |                                                     |                          |                                      |           |                                     |          |                                      |           |                                       |         |                                         |              |                                      |            |                                     |          |                                          |               |                                      |           |                                       |            |                                        |             |                                                      |                          |
| <input type="checkbox"/> 19. Ingingine (eleza) _____       | 19. Other (ingine) _____                                                                                                                                                                                                                                                                                                                                                                                                                                                                                                                                                                                                                                                                                                                                                                                                                                                                                                                                                                                                                                                                                                                                                                                                                                                                                                                                                                                                                                                                                                                                                                                                                                                                                                                                                                                                                                                                                                                                                                                                                                                                                                                                                                                                                                                                                                                                                                                                                                                                                                                                                                                                                                                       |                                      |                 |                                                            |                                     |                                                       |                                 |                                            |              |                                                     |                   |                                        |             |                                                     |                          |                                      |           |                                     |          |                                      |           |                                       |         |                                         |              |                                      |            |                                     |          |                                          |               |                                      |           |                                       |            |                                        |             |                                                      |                          |

|                                                            |                                                                                                                                                                                                                                                                                                                                                                                                                                                                                                                                                                                                                                                                                                                                                                                                                                                                                                                                                                                                  |                                       |                        |                                                            |                                     |                                                       |                                 |                                            |                      |                                                     |                           |                                                            |                  |                                                  |                           |                                                   |                          |                                                   |                          |
|------------------------------------------------------------|--------------------------------------------------------------------------------------------------------------------------------------------------------------------------------------------------------------------------------------------------------------------------------------------------------------------------------------------------------------------------------------------------------------------------------------------------------------------------------------------------------------------------------------------------------------------------------------------------------------------------------------------------------------------------------------------------------------------------------------------------------------------------------------------------------------------------------------------------------------------------------------------------------------------------------------------------------------------------------------------------|---------------------------------------|------------------------|------------------------------------------------------------|-------------------------------------|-------------------------------------------------------|---------------------------------|--------------------------------------------|----------------------|-----------------------------------------------------|---------------------------|------------------------------------------------------------|------------------|--------------------------------------------------|---------------------------|---------------------------------------------------|--------------------------|---------------------------------------------------|--------------------------|
| <b>E3</b>                                                  | <p><b>Mkuu wa nyumba anafanya kazi gani? (Chagua moja)</b><br/>What is the occupation of the head of the household? <i>[Choose one]</i></p> <table border="0"> <tr> <td><input type="checkbox"/> 1. Mkulima</td> <td>1. Subsistence farming</td> </tr> <tr> <td><input type="checkbox"/> 2. Mchungaji mifugo</td> <td>2. Pastoralist</td> </tr> <tr> <td><input type="checkbox"/> 3. Ajira binafsi</td> <td>3. Self-employed</td> </tr> <tr> <td><input type="checkbox"/> 4. Ajira</td> <td>4. Formal employment</td> </tr> <tr> <td><input type="checkbox"/> 5. Hana kazi</td> <td>5. Unemployed</td> </tr> <tr> <td><input type="checkbox"/> 6. Amestaafu</td> <td>6. Retired</td> </tr> <tr> <td><input type="checkbox"/> 7. Mwanafunzi</td> <td>7. Student</td> </tr> <tr> <td><input type="checkbox"/> 8. Injine (eleza): _____</td> <td>8. Other (specify) _____</td> </tr> </table>                                                                                                       | <input type="checkbox"/> 1. Mkulima   | 1. Subsistence farming | <input type="checkbox"/> 2. Mchungaji mifugo               | 2. Pastoralist                      | <input type="checkbox"/> 3. Ajira binafsi             | 3. Self-employed                | <input type="checkbox"/> 4. Ajira          | 4. Formal employment | <input type="checkbox"/> 5. Hana kazi               | 5. Unemployed             | <input type="checkbox"/> 6. Amestaafu                      | 6. Retired       | <input type="checkbox"/> 7. Mwanafunzi           | 7. Student                | <input type="checkbox"/> 8. Injine (eleza): _____ | 8. Other (specify) _____ |                                                   |                          |
| <input type="checkbox"/> 1. Mkulima                        | 1. Subsistence farming                                                                                                                                                                                                                                                                                                                                                                                                                                                                                                                                                                                                                                                                                                                                                                                                                                                                                                                                                                           |                                       |                        |                                                            |                                     |                                                       |                                 |                                            |                      |                                                     |                           |                                                            |                  |                                                  |                           |                                                   |                          |                                                   |                          |
| <input type="checkbox"/> 2. Mchungaji mifugo               | 2. Pastoralist                                                                                                                                                                                                                                                                                                                                                                                                                                                                                                                                                                                                                                                                                                                                                                                                                                                                                                                                                                                   |                                       |                        |                                                            |                                     |                                                       |                                 |                                            |                      |                                                     |                           |                                                            |                  |                                                  |                           |                                                   |                          |                                                   |                          |
| <input type="checkbox"/> 3. Ajira binafsi                  | 3. Self-employed                                                                                                                                                                                                                                                                                                                                                                                                                                                                                                                                                                                                                                                                                                                                                                                                                                                                                                                                                                                 |                                       |                        |                                                            |                                     |                                                       |                                 |                                            |                      |                                                     |                           |                                                            |                  |                                                  |                           |                                                   |                          |                                                   |                          |
| <input type="checkbox"/> 4. Ajira                          | 4. Formal employment                                                                                                                                                                                                                                                                                                                                                                                                                                                                                                                                                                                                                                                                                                                                                                                                                                                                                                                                                                             |                                       |                        |                                                            |                                     |                                                       |                                 |                                            |                      |                                                     |                           |                                                            |                  |                                                  |                           |                                                   |                          |                                                   |                          |
| <input type="checkbox"/> 5. Hana kazi                      | 5. Unemployed                                                                                                                                                                                                                                                                                                                                                                                                                                                                                                                                                                                                                                                                                                                                                                                                                                                                                                                                                                                    |                                       |                        |                                                            |                                     |                                                       |                                 |                                            |                      |                                                     |                           |                                                            |                  |                                                  |                           |                                                   |                          |                                                   |                          |
| <input type="checkbox"/> 6. Amestaafu                      | 6. Retired                                                                                                                                                                                                                                                                                                                                                                                                                                                                                                                                                                                                                                                                                                                                                                                                                                                                                                                                                                                       |                                       |                        |                                                            |                                     |                                                       |                                 |                                            |                      |                                                     |                           |                                                            |                  |                                                  |                           |                                                   |                          |                                                   |                          |
| <input type="checkbox"/> 7. Mwanafunzi                     | 7. Student                                                                                                                                                                                                                                                                                                                                                                                                                                                                                                                                                                                                                                                                                                                                                                                                                                                                                                                                                                                       |                                       |                        |                                                            |                                     |                                                       |                                 |                                            |                      |                                                     |                           |                                                            |                  |                                                  |                           |                                                   |                          |                                                   |                          |
| <input type="checkbox"/> 8. Injine (eleza): _____          | 8. Other (specify) _____                                                                                                                                                                                                                                                                                                                                                                                                                                                                                                                                                                                                                                                                                                                                                                                                                                                                                                                                                                         |                                       |                        |                                                            |                                     |                                                       |                                 |                                            |                      |                                                     |                           |                                                            |                  |                                                  |                           |                                                   |                          |                                                   |                          |
| <b>E4</b>                                                  | <p><b>Kiwango cha juu cha masomo cha Mkuu wa nyumba ni kipi?</b><br/>What is the highest level of education attained by the head of the household?</p> <table border="0"> <tr> <td><input type="checkbox"/> 1. Hajasoma</td> <td>1. No education</td> </tr> <tr> <td><input type="checkbox"/> 2. Shule ya msingi, hajakamilisha</td> <td>2. Primary education- not completed</td> </tr> <tr> <td><input type="checkbox"/> 3. Shule ya msinigi kamilifu</td> <td>3. Primary education- completed</td> </tr> <tr> <td><input type="checkbox"/> 4. Shule ya upili</td> <td>4. Secondary</td> </tr> <tr> <td><input type="checkbox"/> 5. Zaidi ya shule ya upili</td> <td>5. Post-secondary</td> </tr> <tr> <td><input type="checkbox"/> 6. Madrasa</td> <td>6. Madrasa</td> </tr> <tr> <td><input type="checkbox"/> 7. Injine, eleza: _____</td> <td>7. Other (specify) _____</td> </tr> </table>                                                                                                   | <input type="checkbox"/> 1. Hajasoma  | 1. No education        | <input type="checkbox"/> 2. Shule ya msingi, hajakamilisha | 2. Primary education- not completed | <input type="checkbox"/> 3. Shule ya msinigi kamilifu | 3. Primary education- completed | <input type="checkbox"/> 4. Shule ya upili | 4. Secondary         | <input type="checkbox"/> 5. Zaidi ya shule ya upili | 5. Post-secondary         | <input type="checkbox"/> 6. Madrasa                        | 6. Madrasa       | <input type="checkbox"/> 7. Injine, eleza: _____ | 7. Other (specify) _____  |                                                   |                          |                                                   |                          |
| <input type="checkbox"/> 1. Hajasoma                       | 1. No education                                                                                                                                                                                                                                                                                                                                                                                                                                                                                                                                                                                                                                                                                                                                                                                                                                                                                                                                                                                  |                                       |                        |                                                            |                                     |                                                       |                                 |                                            |                      |                                                     |                           |                                                            |                  |                                                  |                           |                                                   |                          |                                                   |                          |
| <input type="checkbox"/> 2. Shule ya msingi, hajakamilisha | 2. Primary education- not completed                                                                                                                                                                                                                                                                                                                                                                                                                                                                                                                                                                                                                                                                                                                                                                                                                                                                                                                                                              |                                       |                        |                                                            |                                     |                                                       |                                 |                                            |                      |                                                     |                           |                                                            |                  |                                                  |                           |                                                   |                          |                                                   |                          |
| <input type="checkbox"/> 3. Shule ya msinigi kamilifu      | 3. Primary education- completed                                                                                                                                                                                                                                                                                                                                                                                                                                                                                                                                                                                                                                                                                                                                                                                                                                                                                                                                                                  |                                       |                        |                                                            |                                     |                                                       |                                 |                                            |                      |                                                     |                           |                                                            |                  |                                                  |                           |                                                   |                          |                                                   |                          |
| <input type="checkbox"/> 4. Shule ya upili                 | 4. Secondary                                                                                                                                                                                                                                                                                                                                                                                                                                                                                                                                                                                                                                                                                                                                                                                                                                                                                                                                                                                     |                                       |                        |                                                            |                                     |                                                       |                                 |                                            |                      |                                                     |                           |                                                            |                  |                                                  |                           |                                                   |                          |                                                   |                          |
| <input type="checkbox"/> 5. Zaidi ya shule ya upili        | 5. Post-secondary                                                                                                                                                                                                                                                                                                                                                                                                                                                                                                                                                                                                                                                                                                                                                                                                                                                                                                                                                                                |                                       |                        |                                                            |                                     |                                                       |                                 |                                            |                      |                                                     |                           |                                                            |                  |                                                  |                           |                                                   |                          |                                                   |                          |
| <input type="checkbox"/> 6. Madrasa                        | 6. Madrasa                                                                                                                                                                                                                                                                                                                                                                                                                                                                                                                                                                                                                                                                                                                                                                                                                                                                                                                                                                                       |                                       |                        |                                                            |                                     |                                                       |                                 |                                            |                      |                                                     |                           |                                                            |                  |                                                  |                           |                                                   |                          |                                                   |                          |
| <input type="checkbox"/> 7. Injine, eleza: _____           | 7. Other (specify) _____                                                                                                                                                                                                                                                                                                                                                                                                                                                                                                                                                                                                                                                                                                                                                                                                                                                                                                                                                                         |                                       |                        |                                                            |                                     |                                                       |                                 |                                            |                      |                                                     |                           |                                                            |                  |                                                  |                           |                                                   |                          |                                                   |                          |
| <b>E5</b>                                                  | <p><b>Je, mkuu wa nyumba ni wa dini gani? [Chagua moja]</b><br/>What is the religion of the household head? <i>[Choose one]</i></p> <table border="0"> <tr> <td><input type="checkbox"/> 1. MKatoliki</td> <td>1. Catholic</td> </tr> <tr> <td><input type="checkbox"/> 2. Mkristo (protestant)</td> <td>2. Protestant</td> </tr> <tr> <td><input type="checkbox"/> 3. Wakristo wengine</td> <td>3. Other Christian</td> </tr> <tr> <td><input type="checkbox"/> 4. Mwislamu</td> <td>4. Muslim</td> </tr> <tr> <td><input type="checkbox"/> 5. Mhindu</td> <td>5. Hindu</td> </tr> <tr> <td><input type="checkbox"/> 6. Hakuna</td> <td>6. None</td> </tr> <tr> <td><input type="checkbox"/> 7. Injine, eleza: _____</td> <td>7. Other (specify): _____</td> </tr> </table>                                                                                                                                                                                                                     | <input type="checkbox"/> 1. MKatoliki | 1. Catholic            | <input type="checkbox"/> 2. Mkristo (protestant)           | 2. Protestant                       | <input type="checkbox"/> 3. Wakristo wengine          | 3. Other Christian              | <input type="checkbox"/> 4. Mwislamu       | 4. Muslim            | <input type="checkbox"/> 5. Mhindu                  | 5. Hindu                  | <input type="checkbox"/> 6. Hakuna                         | 6. None          | <input type="checkbox"/> 7. Injine, eleza: _____ | 7. Other (specify): _____ |                                                   |                          |                                                   |                          |
| <input type="checkbox"/> 1. MKatoliki                      | 1. Catholic                                                                                                                                                                                                                                                                                                                                                                                                                                                                                                                                                                                                                                                                                                                                                                                                                                                                                                                                                                                      |                                       |                        |                                                            |                                     |                                                       |                                 |                                            |                      |                                                     |                           |                                                            |                  |                                                  |                           |                                                   |                          |                                                   |                          |
| <input type="checkbox"/> 2. Mkristo (protestant)           | 2. Protestant                                                                                                                                                                                                                                                                                                                                                                                                                                                                                                                                                                                                                                                                                                                                                                                                                                                                                                                                                                                    |                                       |                        |                                                            |                                     |                                                       |                                 |                                            |                      |                                                     |                           |                                                            |                  |                                                  |                           |                                                   |                          |                                                   |                          |
| <input type="checkbox"/> 3. Wakristo wengine               | 3. Other Christian                                                                                                                                                                                                                                                                                                                                                                                                                                                                                                                                                                                                                                                                                                                                                                                                                                                                                                                                                                               |                                       |                        |                                                            |                                     |                                                       |                                 |                                            |                      |                                                     |                           |                                                            |                  |                                                  |                           |                                                   |                          |                                                   |                          |
| <input type="checkbox"/> 4. Mwislamu                       | 4. Muslim                                                                                                                                                                                                                                                                                                                                                                                                                                                                                                                                                                                                                                                                                                                                                                                                                                                                                                                                                                                        |                                       |                        |                                                            |                                     |                                                       |                                 |                                            |                      |                                                     |                           |                                                            |                  |                                                  |                           |                                                   |                          |                                                   |                          |
| <input type="checkbox"/> 5. Mhindu                         | 5. Hindu                                                                                                                                                                                                                                                                                                                                                                                                                                                                                                                                                                                                                                                                                                                                                                                                                                                                                                                                                                                         |                                       |                        |                                                            |                                     |                                                       |                                 |                                            |                      |                                                     |                           |                                                            |                  |                                                  |                           |                                                   |                          |                                                   |                          |
| <input type="checkbox"/> 6. Hakuna                         | 6. None                                                                                                                                                                                                                                                                                                                                                                                                                                                                                                                                                                                                                                                                                                                                                                                                                                                                                                                                                                                          |                                       |                        |                                                            |                                     |                                                       |                                 |                                            |                      |                                                     |                           |                                                            |                  |                                                  |                           |                                                   |                          |                                                   |                          |
| <input type="checkbox"/> 7. Injine, eleza: _____           | 7. Other (specify): _____                                                                                                                                                                                                                                                                                                                                                                                                                                                                                                                                                                                                                                                                                                                                                                                                                                                                                                                                                                        |                                       |                        |                                                            |                                     |                                                       |                                 |                                            |                      |                                                     |                           |                                                            |                  |                                                  |                           |                                                   |                          |                                                   |                          |
| <b>E6</b>                                                  | <p><b>Je nyumba hii ina vyumba vingapi vya kulala</b><br/>How many separate rooms for sleeping are in the main dwelling unit?</p> <p><b>Idadi / Number</b> _____</p>                                                                                                                                                                                                                                                                                                                                                                                                                                                                                                                                                                                                                                                                                                                                                                                                                             |                                       |                        |                                                            |                                     |                                                       |                                 |                                            |                      |                                                     |                           |                                                            |                  |                                                  |                           |                                                   |                          |                                                   |                          |
| <b>E7</b>                                                  | <p><b>Je, sakafu ya nyumba imetengenezwa kwa kutumia nini? [Chagua moja]</b><br/>What is the MAIN type of flooring for your house? <i>[Choose one.]</i></p> <table border="0"> <tr> <td><input type="checkbox"/> 1. Simiti</td> <td>1. Cement</td> </tr> <tr> <td><input type="checkbox"/> 2. Udongo</td> <td>2. Earth/sand</td> </tr> <tr> <td><input type="checkbox"/> 3. Chaa cha ng'ombe</td> <td>3. Mud/cowdung</td> </tr> <tr> <td><input type="checkbox"/> 4. Tiles</td> <td>4. Ceramic tiles</td> </tr> <tr> <td><input type="checkbox"/> 5. Mbao</td> <td>5. Unfinished wood/planks</td> </tr> <tr> <td><input type="checkbox"/> 6. Mbao ( imepakwa vanish/polish)</td> <td>6. Polished wood</td> </tr> <tr> <td><input type="checkbox"/> 7. PCV</td> <td>7. Vinyl/asphalt strips</td> </tr> <tr> <td><input type="checkbox"/> 8. Carpet</td> <td>8. Carpet</td> </tr> <tr> <td><input type="checkbox"/> 9. Injine (eleza): _____</td> <td>9. Other (specify) _____</td> </tr> </table> | <input type="checkbox"/> 1. Simiti    | 1. Cement              | <input type="checkbox"/> 2. Udongo                         | 2. Earth/sand                       | <input type="checkbox"/> 3. Chaa cha ng'ombe          | 3. Mud/cowdung                  | <input type="checkbox"/> 4. Tiles          | 4. Ceramic tiles     | <input type="checkbox"/> 5. Mbao                    | 5. Unfinished wood/planks | <input type="checkbox"/> 6. Mbao ( imepakwa vanish/polish) | 6. Polished wood | <input type="checkbox"/> 7. PCV                  | 7. Vinyl/asphalt strips   | <input type="checkbox"/> 8. Carpet                | 8. Carpet                | <input type="checkbox"/> 9. Injine (eleza): _____ | 9. Other (specify) _____ |
| <input type="checkbox"/> 1. Simiti                         | 1. Cement                                                                                                                                                                                                                                                                                                                                                                                                                                                                                                                                                                                                                                                                                                                                                                                                                                                                                                                                                                                        |                                       |                        |                                                            |                                     |                                                       |                                 |                                            |                      |                                                     |                           |                                                            |                  |                                                  |                           |                                                   |                          |                                                   |                          |
| <input type="checkbox"/> 2. Udongo                         | 2. Earth/sand                                                                                                                                                                                                                                                                                                                                                                                                                                                                                                                                                                                                                                                                                                                                                                                                                                                                                                                                                                                    |                                       |                        |                                                            |                                     |                                                       |                                 |                                            |                      |                                                     |                           |                                                            |                  |                                                  |                           |                                                   |                          |                                                   |                          |
| <input type="checkbox"/> 3. Chaa cha ng'ombe               | 3. Mud/cowdung                                                                                                                                                                                                                                                                                                                                                                                                                                                                                                                                                                                                                                                                                                                                                                                                                                                                                                                                                                                   |                                       |                        |                                                            |                                     |                                                       |                                 |                                            |                      |                                                     |                           |                                                            |                  |                                                  |                           |                                                   |                          |                                                   |                          |
| <input type="checkbox"/> 4. Tiles                          | 4. Ceramic tiles                                                                                                                                                                                                                                                                                                                                                                                                                                                                                                                                                                                                                                                                                                                                                                                                                                                                                                                                                                                 |                                       |                        |                                                            |                                     |                                                       |                                 |                                            |                      |                                                     |                           |                                                            |                  |                                                  |                           |                                                   |                          |                                                   |                          |
| <input type="checkbox"/> 5. Mbao                           | 5. Unfinished wood/planks                                                                                                                                                                                                                                                                                                                                                                                                                                                                                                                                                                                                                                                                                                                                                                                                                                                                                                                                                                        |                                       |                        |                                                            |                                     |                                                       |                                 |                                            |                      |                                                     |                           |                                                            |                  |                                                  |                           |                                                   |                          |                                                   |                          |
| <input type="checkbox"/> 6. Mbao ( imepakwa vanish/polish) | 6. Polished wood                                                                                                                                                                                                                                                                                                                                                                                                                                                                                                                                                                                                                                                                                                                                                                                                                                                                                                                                                                                 |                                       |                        |                                                            |                                     |                                                       |                                 |                                            |                      |                                                     |                           |                                                            |                  |                                                  |                           |                                                   |                          |                                                   |                          |
| <input type="checkbox"/> 7. PCV                            | 7. Vinyl/asphalt strips                                                                                                                                                                                                                                                                                                                                                                                                                                                                                                                                                                                                                                                                                                                                                                                                                                                                                                                                                                          |                                       |                        |                                                            |                                     |                                                       |                                 |                                            |                      |                                                     |                           |                                                            |                  |                                                  |                           |                                                   |                          |                                                   |                          |
| <input type="checkbox"/> 8. Carpet                         | 8. Carpet                                                                                                                                                                                                                                                                                                                                                                                                                                                                                                                                                                                                                                                                                                                                                                                                                                                                                                                                                                                        |                                       |                        |                                                            |                                     |                                                       |                                 |                                            |                      |                                                     |                           |                                                            |                  |                                                  |                           |                                                   |                          |                                                   |                          |
| <input type="checkbox"/> 9. Injine (eleza): _____          | 9. Other (specify) _____                                                                                                                                                                                                                                                                                                                                                                                                                                                                                                                                                                                                                                                                                                                                                                                                                                                                                                                                                                         |                                       |                        |                                                            |                                     |                                                       |                                 |                                            |                      |                                                     |                           |                                                            |                  |                                                  |                           |                                                   |                          |                                                   |                          |

|                                                   |                                                                                                                                                                                                                                                                                                                                                                                                                                                                                                                                                                                                                                                                                                                                                                                                                                                                                                               |                                    |                  |                                            |                |                                         |             |                                          |                 |                                  |         |                                                   |                           |                                                  |                          |                                            |                          |                                       |              |
|---------------------------------------------------|---------------------------------------------------------------------------------------------------------------------------------------------------------------------------------------------------------------------------------------------------------------------------------------------------------------------------------------------------------------------------------------------------------------------------------------------------------------------------------------------------------------------------------------------------------------------------------------------------------------------------------------------------------------------------------------------------------------------------------------------------------------------------------------------------------------------------------------------------------------------------------------------------------------|------------------------------------|------------------|--------------------------------------------|----------------|-----------------------------------------|-------------|------------------------------------------|-----------------|----------------------------------|---------|---------------------------------------------------|---------------------------|--------------------------------------------------|--------------------------|--------------------------------------------|--------------------------|---------------------------------------|--------------|
| <b>E8</b>                                         | <p><b>Je, kuta za nyumba hii zimetengenezwa kwa kutumia nini? [Chagua moja]</b><br/> <b>What is the main type of materials used for the walls for your house? [Choose one]</b></p> <table border="0"> <tr> <td><input type="checkbox"/> 1. Simiti</td> <td>1. Cement/Bricks</td> </tr> <tr> <td><input type="checkbox"/> 2. Udongo/samadi</td> <td>2. Mud/cowdung</td> </tr> <tr> <td><input type="checkbox"/> 3. Mawe</td> <td>3. Stone</td> </tr> <tr> <td><input type="checkbox"/> 4. Nyasi/Makuti</td> <td>4. Grass/makuti</td> </tr> <tr> <td><input type="checkbox"/> 5. Mbao</td> <td>5. Wood</td> </tr> <tr> <td><input type="checkbox"/> 6. Mabati</td> <td>6. Iron sheets</td> </tr> <tr> <td><input type="checkbox"/> 7. Tiles</td> <td>7. Tiles</td> </tr> <tr> <td><input type="checkbox"/> 8. Injine,(eleza)</td> <td>8. Other (specify) _____</td> </tr> </table>                              | <input type="checkbox"/> 1. Simiti | 1. Cement/Bricks | <input type="checkbox"/> 2. Udongo/samadi  | 2. Mud/cowdung | <input type="checkbox"/> 3. Mawe        | 3. Stone    | <input type="checkbox"/> 4. Nyasi/Makuti | 4. Grass/makuti | <input type="checkbox"/> 5. Mbao | 5. Wood | <input type="checkbox"/> 6. Mabati                | 6. Iron sheets            | <input type="checkbox"/> 7. Tiles                | 7. Tiles                 | <input type="checkbox"/> 8. Injine,(eleza) | 8. Other (specify) _____ |                                       |              |
| <input type="checkbox"/> 1. Simiti                | 1. Cement/Bricks                                                                                                                                                                                                                                                                                                                                                                                                                                                                                                                                                                                                                                                                                                                                                                                                                                                                                              |                                    |                  |                                            |                |                                         |             |                                          |                 |                                  |         |                                                   |                           |                                                  |                          |                                            |                          |                                       |              |
| <input type="checkbox"/> 2. Udongo/samadi         | 2. Mud/cowdung                                                                                                                                                                                                                                                                                                                                                                                                                                                                                                                                                                                                                                                                                                                                                                                                                                                                                                |                                    |                  |                                            |                |                                         |             |                                          |                 |                                  |         |                                                   |                           |                                                  |                          |                                            |                          |                                       |              |
| <input type="checkbox"/> 3. Mawe                  | 3. Stone                                                                                                                                                                                                                                                                                                                                                                                                                                                                                                                                                                                                                                                                                                                                                                                                                                                                                                      |                                    |                  |                                            |                |                                         |             |                                          |                 |                                  |         |                                                   |                           |                                                  |                          |                                            |                          |                                       |              |
| <input type="checkbox"/> 4. Nyasi/Makuti          | 4. Grass/makuti                                                                                                                                                                                                                                                                                                                                                                                                                                                                                                                                                                                                                                                                                                                                                                                                                                                                                               |                                    |                  |                                            |                |                                         |             |                                          |                 |                                  |         |                                                   |                           |                                                  |                          |                                            |                          |                                       |              |
| <input type="checkbox"/> 5. Mbao                  | 5. Wood                                                                                                                                                                                                                                                                                                                                                                                                                                                                                                                                                                                                                                                                                                                                                                                                                                                                                                       |                                    |                  |                                            |                |                                         |             |                                          |                 |                                  |         |                                                   |                           |                                                  |                          |                                            |                          |                                       |              |
| <input type="checkbox"/> 6. Mabati                | 6. Iron sheets                                                                                                                                                                                                                                                                                                                                                                                                                                                                                                                                                                                                                                                                                                                                                                                                                                                                                                |                                    |                  |                                            |                |                                         |             |                                          |                 |                                  |         |                                                   |                           |                                                  |                          |                                            |                          |                                       |              |
| <input type="checkbox"/> 7. Tiles                 | 7. Tiles                                                                                                                                                                                                                                                                                                                                                                                                                                                                                                                                                                                                                                                                                                                                                                                                                                                                                                      |                                    |                  |                                            |                |                                         |             |                                          |                 |                                  |         |                                                   |                           |                                                  |                          |                                            |                          |                                       |              |
| <input type="checkbox"/> 8. Injine,(eleza)        | 8. Other (specify) _____                                                                                                                                                                                                                                                                                                                                                                                                                                                                                                                                                                                                                                                                                                                                                                                                                                                                                      |                                    |                  |                                            |                |                                         |             |                                          |                 |                                  |         |                                                   |                           |                                                  |                          |                                            |                          |                                       |              |
| <b>E9</b>                                         | <p><b>Je, paa ya nyumba hii imetengenezwa kwa kutumia nini? [Chagua moja]</b><br/> <b>What is the main type of material used for the roof for your house? [Choose one]</b></p> <table border="0"> <tr> <td><input type="checkbox"/> 1. Simiti</td> <td>1. Cement/Bricks</td> </tr> <tr> <td><input type="checkbox"/> 2. Udongo/Samadi</td> <td>2. Mud/cowdung</td> </tr> <tr> <td><input type="checkbox"/> 3. Mawe</td> <td>3. Stone</td> </tr> <tr> <td><input type="checkbox"/> 4. Nyasi/Makuti</td> <td>4. Grass/makuti</td> </tr> <tr> <td><input type="checkbox"/> 5. Mbao</td> <td>5. Wood</td> </tr> <tr> <td><input type="checkbox"/> 6. Mabati</td> <td>6. Iron sheets</td> </tr> <tr> <td><input type="checkbox"/> 7. Tiles</td> <td>7. Tiles</td> </tr> <tr> <td><input type="checkbox"/> 8. Injine (Eleza)</td> <td>8. Other (specify) _____</td> </tr> </table>                                  | <input type="checkbox"/> 1. Simiti | 1. Cement/Bricks | <input type="checkbox"/> 2. Udongo/Samadi  | 2. Mud/cowdung | <input type="checkbox"/> 3. Mawe        | 3. Stone    | <input type="checkbox"/> 4. Nyasi/Makuti | 4. Grass/makuti | <input type="checkbox"/> 5. Mbao | 5. Wood | <input type="checkbox"/> 6. Mabati                | 6. Iron sheets            | <input type="checkbox"/> 7. Tiles                | 7. Tiles                 | <input type="checkbox"/> 8. Injine (Eleza) | 8. Other (specify) _____ |                                       |              |
| <input type="checkbox"/> 1. Simiti                | 1. Cement/Bricks                                                                                                                                                                                                                                                                                                                                                                                                                                                                                                                                                                                                                                                                                                                                                                                                                                                                                              |                                    |                  |                                            |                |                                         |             |                                          |                 |                                  |         |                                                   |                           |                                                  |                          |                                            |                          |                                       |              |
| <input type="checkbox"/> 2. Udongo/Samadi         | 2. Mud/cowdung                                                                                                                                                                                                                                                                                                                                                                                                                                                                                                                                                                                                                                                                                                                                                                                                                                                                                                |                                    |                  |                                            |                |                                         |             |                                          |                 |                                  |         |                                                   |                           |                                                  |                          |                                            |                          |                                       |              |
| <input type="checkbox"/> 3. Mawe                  | 3. Stone                                                                                                                                                                                                                                                                                                                                                                                                                                                                                                                                                                                                                                                                                                                                                                                                                                                                                                      |                                    |                  |                                            |                |                                         |             |                                          |                 |                                  |         |                                                   |                           |                                                  |                          |                                            |                          |                                       |              |
| <input type="checkbox"/> 4. Nyasi/Makuti          | 4. Grass/makuti                                                                                                                                                                                                                                                                                                                                                                                                                                                                                                                                                                                                                                                                                                                                                                                                                                                                                               |                                    |                  |                                            |                |                                         |             |                                          |                 |                                  |         |                                                   |                           |                                                  |                          |                                            |                          |                                       |              |
| <input type="checkbox"/> 5. Mbao                  | 5. Wood                                                                                                                                                                                                                                                                                                                                                                                                                                                                                                                                                                                                                                                                                                                                                                                                                                                                                                       |                                    |                  |                                            |                |                                         |             |                                          |                 |                                  |         |                                                   |                           |                                                  |                          |                                            |                          |                                       |              |
| <input type="checkbox"/> 6. Mabati                | 6. Iron sheets                                                                                                                                                                                                                                                                                                                                                                                                                                                                                                                                                                                                                                                                                                                                                                                                                                                                                                |                                    |                  |                                            |                |                                         |             |                                          |                 |                                  |         |                                                   |                           |                                                  |                          |                                            |                          |                                       |              |
| <input type="checkbox"/> 7. Tiles                 | 7. Tiles                                                                                                                                                                                                                                                                                                                                                                                                                                                                                                                                                                                                                                                                                                                                                                                                                                                                                                      |                                    |                  |                                            |                |                                         |             |                                          |                 |                                  |         |                                                   |                           |                                                  |                          |                                            |                          |                                       |              |
| <input type="checkbox"/> 8. Injine (Eleza)        | 8. Other (specify) _____                                                                                                                                                                                                                                                                                                                                                                                                                                                                                                                                                                                                                                                                                                                                                                                                                                                                                      |                                    |                  |                                            |                |                                         |             |                                          |                 |                                  |         |                                                   |                           |                                                  |                          |                                            |                          |                                       |              |
| <b>E10</b>                                        | <p><b>Je mnapata mwangaza kwa kutumia nini? [Chagua moja]</b><br/> <b>What is your MAIN source of lighting? [Choose one.]</b></p> <table border="0"> <tr> <td><input type="checkbox"/> 1. Stima</td> <td>1. Electricity</td> </tr> <tr> <td><input type="checkbox"/> 2. Nishati ya jua</td> <td>2. Solar</td> </tr> <tr> <td><input type="checkbox"/> 3. Kuni</td> <td>3. Firewood</td> </tr> <tr> <td><input type="checkbox"/> 4. Mafuta taa</td> <td>4. Kerosene</td> </tr> <tr> <td><input type="checkbox"/> 5. Gesi</td> <td>5. Gas</td> </tr> <tr> <td><input type="checkbox"/> 6. Mshumaa</td> <td>6. Candles</td> </tr> <tr> <td><input type="checkbox"/> 7. Injine (eleza) _____</td> <td>7. Other (specify) _____</td> </tr> </table>                                                                                                                                                                | <input type="checkbox"/> 1. Stima  | 1. Electricity   | <input type="checkbox"/> 2. Nishati ya jua | 2. Solar       | <input type="checkbox"/> 3. Kuni        | 3. Firewood | <input type="checkbox"/> 4. Mafuta taa   | 4. Kerosene     | <input type="checkbox"/> 5. Gesi | 5. Gas  | <input type="checkbox"/> 6. Mshumaa               | 6. Candles                | <input type="checkbox"/> 7. Injine (eleza) _____ | 7. Other (specify) _____ |                                            |                          |                                       |              |
| <input type="checkbox"/> 1. Stima                 | 1. Electricity                                                                                                                                                                                                                                                                                                                                                                                                                                                                                                                                                                                                                                                                                                                                                                                                                                                                                                |                                    |                  |                                            |                |                                         |             |                                          |                 |                                  |         |                                                   |                           |                                                  |                          |                                            |                          |                                       |              |
| <input type="checkbox"/> 2. Nishati ya jua        | 2. Solar                                                                                                                                                                                                                                                                                                                                                                                                                                                                                                                                                                                                                                                                                                                                                                                                                                                                                                      |                                    |                  |                                            |                |                                         |             |                                          |                 |                                  |         |                                                   |                           |                                                  |                          |                                            |                          |                                       |              |
| <input type="checkbox"/> 3. Kuni                  | 3. Firewood                                                                                                                                                                                                                                                                                                                                                                                                                                                                                                                                                                                                                                                                                                                                                                                                                                                                                                   |                                    |                  |                                            |                |                                         |             |                                          |                 |                                  |         |                                                   |                           |                                                  |                          |                                            |                          |                                       |              |
| <input type="checkbox"/> 4. Mafuta taa            | 4. Kerosene                                                                                                                                                                                                                                                                                                                                                                                                                                                                                                                                                                                                                                                                                                                                                                                                                                                                                                   |                                    |                  |                                            |                |                                         |             |                                          |                 |                                  |         |                                                   |                           |                                                  |                          |                                            |                          |                                       |              |
| <input type="checkbox"/> 5. Gesi                  | 5. Gas                                                                                                                                                                                                                                                                                                                                                                                                                                                                                                                                                                                                                                                                                                                                                                                                                                                                                                        |                                    |                  |                                            |                |                                         |             |                                          |                 |                                  |         |                                                   |                           |                                                  |                          |                                            |                          |                                       |              |
| <input type="checkbox"/> 6. Mshumaa               | 6. Candles                                                                                                                                                                                                                                                                                                                                                                                                                                                                                                                                                                                                                                                                                                                                                                                                                                                                                                    |                                    |                  |                                            |                |                                         |             |                                          |                 |                                  |         |                                                   |                           |                                                  |                          |                                            |                          |                                       |              |
| <input type="checkbox"/> 7. Injine (eleza) _____  | 7. Other (specify) _____                                                                                                                                                                                                                                                                                                                                                                                                                                                                                                                                                                                                                                                                                                                                                                                                                                                                                      |                                    |                  |                                            |                |                                         |             |                                          |                 |                                  |         |                                                   |                           |                                                  |                          |                                            |                          |                                       |              |
| <b>E11</b>                                        | <p><b>Mnatumia nini kupika? [Chagua moja]</b><br/> <b>What is your MAIN source of cooking fuel? [Choose one.]</b></p> <table border="0"> <tr> <td><input type="checkbox"/> 1. Kuni</td> <td>1. Firewood</td> </tr> <tr> <td><input type="checkbox"/> 2. Makaa</td> <td>2. Charcoal</td> </tr> <tr> <td><input type="checkbox"/> 3. Mafuta taa</td> <td>3. Kerosene</td> </tr> <tr> <td><input type="checkbox"/> 4. Stima</td> <td>4. Electricity</td> </tr> <tr> <td><input type="checkbox"/> 5. Gesi</td> <td>5. Gas</td> </tr> <tr> <td><input type="checkbox"/> 6. Injine (eleza): _____</td> <td>6. Other (specify): _____</td> </tr> </table>                                                                                                                                                                                                                                                            | <input type="checkbox"/> 1. Kuni   | 1. Firewood      | <input type="checkbox"/> 2. Makaa          | 2. Charcoal    | <input type="checkbox"/> 3. Mafuta taa  | 3. Kerosene | <input type="checkbox"/> 4. Stima        | 4. Electricity  | <input type="checkbox"/> 5. Gesi | 5. Gas  | <input type="checkbox"/> 6. Injine (eleza): _____ | 6. Other (specify): _____ |                                                  |                          |                                            |                          |                                       |              |
| <input type="checkbox"/> 1. Kuni                  | 1. Firewood                                                                                                                                                                                                                                                                                                                                                                                                                                                                                                                                                                                                                                                                                                                                                                                                                                                                                                   |                                    |                  |                                            |                |                                         |             |                                          |                 |                                  |         |                                                   |                           |                                                  |                          |                                            |                          |                                       |              |
| <input type="checkbox"/> 2. Makaa                 | 2. Charcoal                                                                                                                                                                                                                                                                                                                                                                                                                                                                                                                                                                                                                                                                                                                                                                                                                                                                                                   |                                    |                  |                                            |                |                                         |             |                                          |                 |                                  |         |                                                   |                           |                                                  |                          |                                            |                          |                                       |              |
| <input type="checkbox"/> 3. Mafuta taa            | 3. Kerosene                                                                                                                                                                                                                                                                                                                                                                                                                                                                                                                                                                                                                                                                                                                                                                                                                                                                                                   |                                    |                  |                                            |                |                                         |             |                                          |                 |                                  |         |                                                   |                           |                                                  |                          |                                            |                          |                                       |              |
| <input type="checkbox"/> 4. Stima                 | 4. Electricity                                                                                                                                                                                                                                                                                                                                                                                                                                                                                                                                                                                                                                                                                                                                                                                                                                                                                                |                                    |                  |                                            |                |                                         |             |                                          |                 |                                  |         |                                                   |                           |                                                  |                          |                                            |                          |                                       |              |
| <input type="checkbox"/> 5. Gesi                  | 5. Gas                                                                                                                                                                                                                                                                                                                                                                                                                                                                                                                                                                                                                                                                                                                                                                                                                                                                                                        |                                    |                  |                                            |                |                                         |             |                                          |                 |                                  |         |                                                   |                           |                                                  |                          |                                            |                          |                                       |              |
| <input type="checkbox"/> 6. Injine (eleza): _____ | 6. Other (specify): _____                                                                                                                                                                                                                                                                                                                                                                                                                                                                                                                                                                                                                                                                                                                                                                                                                                                                                     |                                    |                  |                                            |                |                                         |             |                                          |                 |                                  |         |                                                   |                           |                                                  |                          |                                            |                          |                                       |              |
| <b>E12</b>                                        | <p><b>Je, mko na shamba ya kupanda vyakula?</b><br/> <b>Does the household own agricultural land?</b></p> <table border="0"> <tr> <td><input type="checkbox"/> 1. Ndio</td> <td>1. Yes</td> </tr> <tr> <td><input type="checkbox"/> 2. La</td> <td>2. No</td> </tr> </table>                                                                                                                                                                                                                                                                                                                                                                                                                                                                                                                                                                                                                                  | <input type="checkbox"/> 1. Ndio   | 1. Yes           | <input type="checkbox"/> 2. La             | 2. No          |                                         |             |                                          |                 |                                  |         |                                                   |                           |                                                  |                          |                                            |                          |                                       |              |
| <input type="checkbox"/> 1. Ndio                  | 1. Yes                                                                                                                                                                                                                                                                                                                                                                                                                                                                                                                                                                                                                                                                                                                                                                                                                                                                                                        |                                    |                  |                                            |                |                                         |             |                                          |                 |                                  |         |                                                   |                           |                                                  |                          |                                            |                          |                                       |              |
| <input type="checkbox"/> 2. La                    | 2. No                                                                                                                                                                                                                                                                                                                                                                                                                                                                                                                                                                                                                                                                                                                                                                                                                                                                                                         |                                    |                  |                                            |                |                                         |             |                                          |                 |                                  |         |                                                   |                           |                                                  |                          |                                            |                          |                                       |              |
| <b>E13</b>                                        | <p><b>Je, mnazo vifaa gani kati ya hivi? [Chagua zote zinazotajwa]</b><br/> <b>Which of the following items does the household own? [Check all that apply]</b></p> <table border="0"> <tr> <td><input type="checkbox"/> 1. Saa</td> <td>1. Clock/watch</td> </tr> <tr> <td><input type="checkbox"/> 2. Redio</td> <td>2. Radio</td> </tr> <tr> <td><input type="checkbox"/> 3. Televisheni</td> <td>3. TV</td> </tr> <tr> <td><input type="checkbox"/> 4. Meza</td> <td>4. Table</td> </tr> <tr> <td><input type="checkbox"/> 5. Sofa</td> <td>5. Sofa</td> </tr> <tr> <td><input type="checkbox"/> 6. Kabati</td> <td>6. Cupboard</td> </tr> <tr> <td><input type="checkbox"/> 7. Baisikeili</td> <td>7. Bicycle</td> </tr> <tr> <td><input type="checkbox"/> 8. Pikipiki</td> <td>8. Motorcycle/scooter</td> </tr> <tr> <td><input type="checkbox"/> 9. Gari/lori</td> <td>9. Car/truck</td> </tr> </table> | <input type="checkbox"/> 1. Saa    | 1. Clock/watch   | <input type="checkbox"/> 2. Redio          | 2. Radio       | <input type="checkbox"/> 3. Televisheni | 3. TV       | <input type="checkbox"/> 4. Meza         | 4. Table        | <input type="checkbox"/> 5. Sofa | 5. Sofa | <input type="checkbox"/> 6. Kabati                | 6. Cupboard               | <input type="checkbox"/> 7. Baisikeili           | 7. Bicycle               | <input type="checkbox"/> 8. Pikipiki       | 8. Motorcycle/scooter    | <input type="checkbox"/> 9. Gari/lori | 9. Car/truck |
| <input type="checkbox"/> 1. Saa                   | 1. Clock/watch                                                                                                                                                                                                                                                                                                                                                                                                                                                                                                                                                                                                                                                                                                                                                                                                                                                                                                |                                    |                  |                                            |                |                                         |             |                                          |                 |                                  |         |                                                   |                           |                                                  |                          |                                            |                          |                                       |              |
| <input type="checkbox"/> 2. Redio                 | 2. Radio                                                                                                                                                                                                                                                                                                                                                                                                                                                                                                                                                                                                                                                                                                                                                                                                                                                                                                      |                                    |                  |                                            |                |                                         |             |                                          |                 |                                  |         |                                                   |                           |                                                  |                          |                                            |                          |                                       |              |
| <input type="checkbox"/> 3. Televisheni           | 3. TV                                                                                                                                                                                                                                                                                                                                                                                                                                                                                                                                                                                                                                                                                                                                                                                                                                                                                                         |                                    |                  |                                            |                |                                         |             |                                          |                 |                                  |         |                                                   |                           |                                                  |                          |                                            |                          |                                       |              |
| <input type="checkbox"/> 4. Meza                  | 4. Table                                                                                                                                                                                                                                                                                                                                                                                                                                                                                                                                                                                                                                                                                                                                                                                                                                                                                                      |                                    |                  |                                            |                |                                         |             |                                          |                 |                                  |         |                                                   |                           |                                                  |                          |                                            |                          |                                       |              |
| <input type="checkbox"/> 5. Sofa                  | 5. Sofa                                                                                                                                                                                                                                                                                                                                                                                                                                                                                                                                                                                                                                                                                                                                                                                                                                                                                                       |                                    |                  |                                            |                |                                         |             |                                          |                 |                                  |         |                                                   |                           |                                                  |                          |                                            |                          |                                       |              |
| <input type="checkbox"/> 6. Kabati                | 6. Cupboard                                                                                                                                                                                                                                                                                                                                                                                                                                                                                                                                                                                                                                                                                                                                                                                                                                                                                                   |                                    |                  |                                            |                |                                         |             |                                          |                 |                                  |         |                                                   |                           |                                                  |                          |                                            |                          |                                       |              |
| <input type="checkbox"/> 7. Baisikeili            | 7. Bicycle                                                                                                                                                                                                                                                                                                                                                                                                                                                                                                                                                                                                                                                                                                                                                                                                                                                                                                    |                                    |                  |                                            |                |                                         |             |                                          |                 |                                  |         |                                                   |                           |                                                  |                          |                                            |                          |                                       |              |
| <input type="checkbox"/> 8. Pikipiki              | 8. Motorcycle/scooter                                                                                                                                                                                                                                                                                                                                                                                                                                                                                                                                                                                                                                                                                                                                                                                                                                                                                         |                                    |                  |                                            |                |                                         |             |                                          |                 |                                  |         |                                                   |                           |                                                  |                          |                                            |                          |                                       |              |
| <input type="checkbox"/> 9. Gari/lori             | 9. Car/truck                                                                                                                                                                                                                                                                                                                                                                                                                                                                                                                                                                                                                                                                                                                                                                                                                                                                                                  |                                    |                  |                                            |                |                                         |             |                                          |                 |                                  |         |                                                   |                           |                                                  |                          |                                            |                          |                                       |              |



Household serial number \_\_\_\_\_-\_\_\_\_\_

|            |                                                                                                                                                                                                                                                                                      |                 |
|------------|--------------------------------------------------------------------------------------------------------------------------------------------------------------------------------------------------------------------------------------------------------------------------------------|-----------------|
| <b>E14</b> | <b>Je, umewahi kusikia kuhusu mnyoo wa mkanda</b><br>Have you heard of guinea worm?<br><input type="checkbox"/> 1. Ndio<br><input type="checkbox"/> 2. La                                                                                                                            | 1. Yes<br>2. No |
| <b>E15</b> | <b>Je, umewahi kusikia kuhusu zawadi ya Shilingi laki moja kwa watu wanaoripoti matukio ya mnyoo wa mkanda?</b><br>Have you heard of the 100,000 KSH cash reward for reporting suspected cases of Guinea Worm?<br><input type="checkbox"/> 1. Ndio<br><input type="checkbox"/> 2. La | 1. Yes<br>2. No |

**Asante kwa kushiriki kwa mahojiano hii. Je, unayo maswali yoyote?**

**[Jibu maswali yote ya mhojiwa]**

Thank you for participating in this survey. Do you have any questions for me?

*[Answer all questions participant may have]*
