# Supplementary material for: Use of the revised World Health Organization cluster survey methodology to classify measles-rubella vaccination campaign coverage in 47 counties in Kenya, 2016
Source: PubMed Central journal article supplement (PMC6028100; doi:10.1371/journal.pone.0199786), 2018-07-02

## ***Measles-rubella post-vaccination campaign coverage survey in Kenya, 2016***

**Fig S1. Organ-pipe plots of unweighted measles-rubella campaign vaccination coverage by cluster and county — Kenya 2016 (14).** For each cluster, the total number of eligible children aged 9 months–14 years that were enrolled in the survey is printed at the bottom of the bar. Out of the total 720 clusters selected for the survey, 5 clusters were inaccessible (I), and 2 clusters had no eligible (NE) children for inclusion; these clusters are indicated with I or NE printed at the bottom of the bar. Overall, 349 clusters had 100% coverage; 156 had 95–99% coverage; 119 had 90–94% coverage; 41 had 85–89% coverage; 23 had 80–84% coverage; 6 had 75–79% coverage; 6 had 70–74% coverage; 11 had <70% coverage. One cluster each in Nairobi and Wajir had 0% coverage. In the Nairobi cluster with 0%, there was only one eligible child, who was unvaccinated. In the Wajir cluster with 0%, there were three eligible households with a total of 12 unvaccinated children. Reasons for non-vaccination in these two clusters included being unaware of the campaign (9/13) and being unaware of the need for vaccination (1/13).



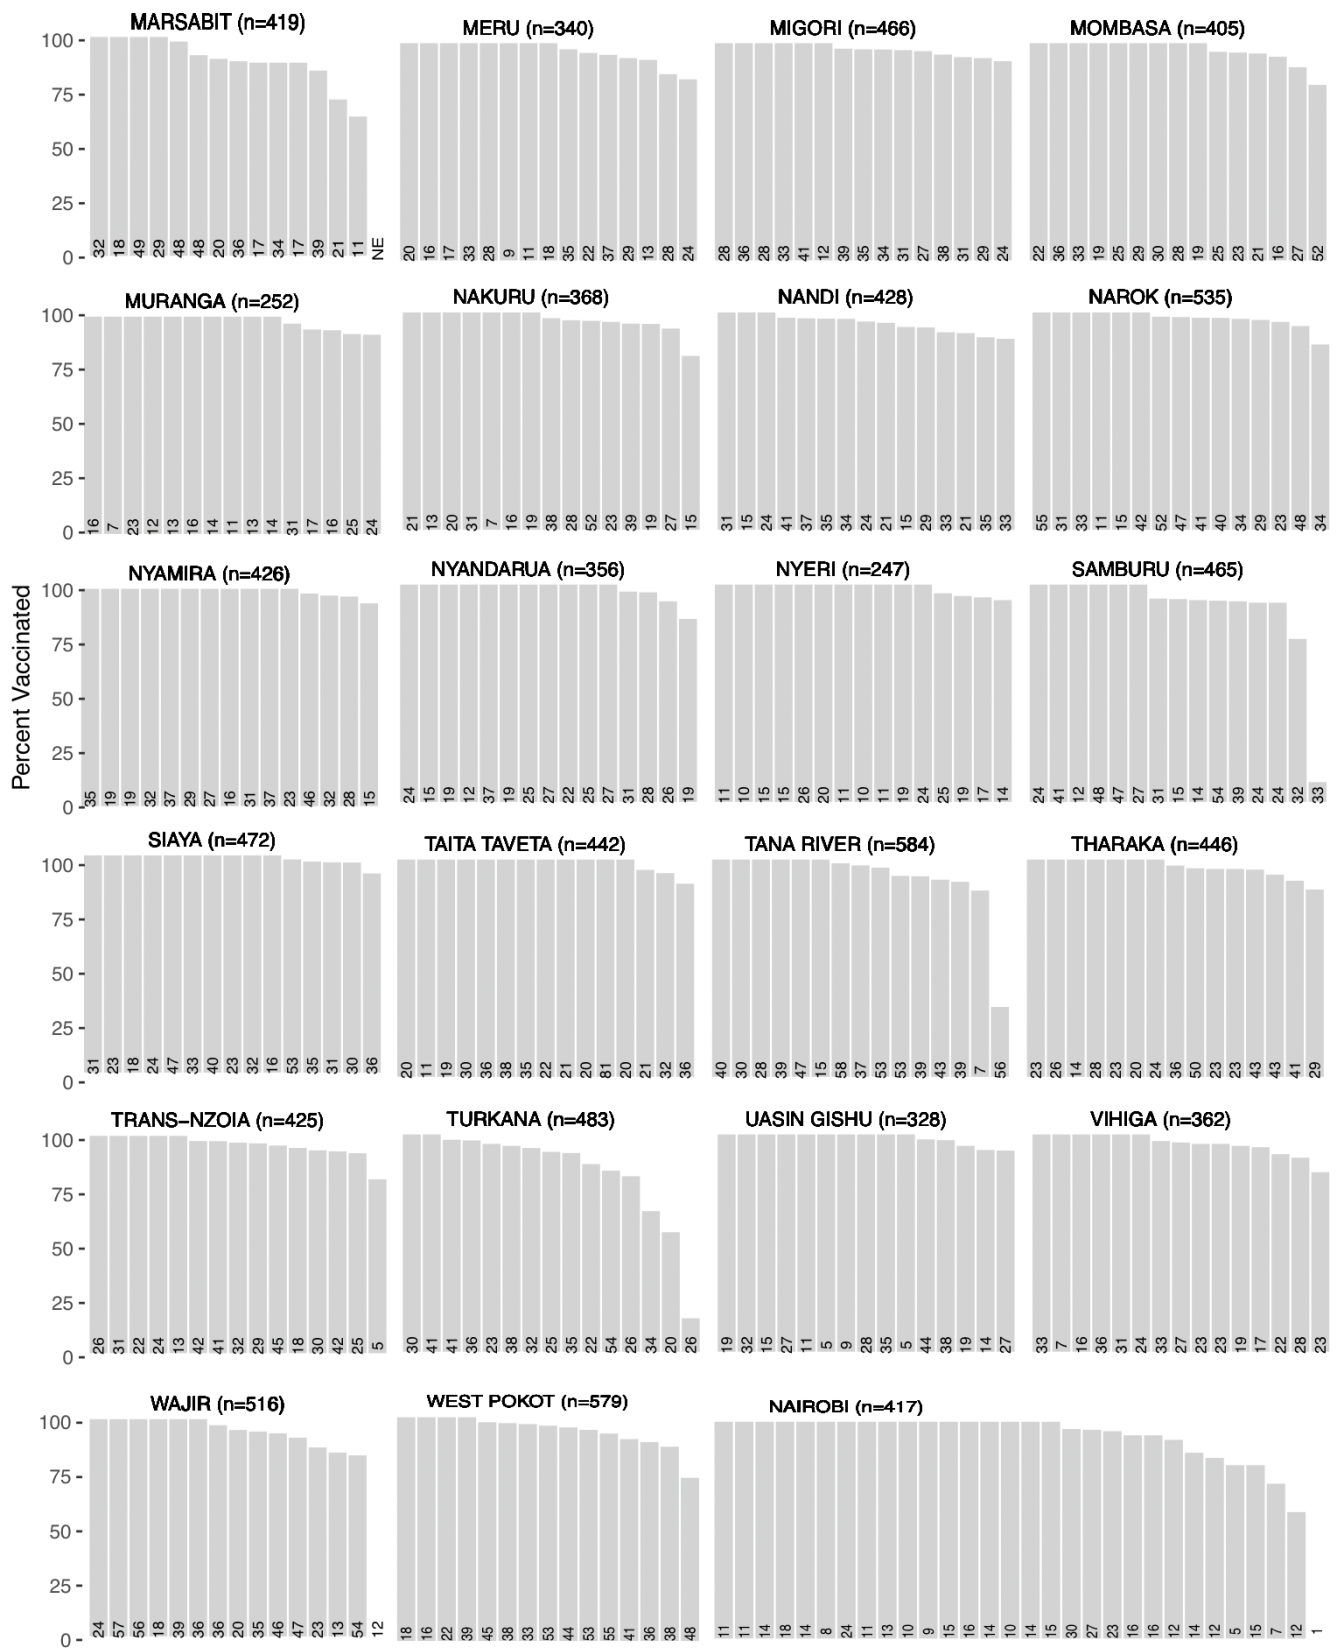

Supplement: pone.0199786.s004.pdf [file pone.0199786.s004.pdf]
